# Supplementary material for: Temporally precise labeling and control of neuromodulatory circuits in the mammalian brain
Source: Springer Nature journal article supplement (doi:10.1038/nmeth.4234), 2017-04-03
Supplement: 41592_2017_BFnmeth4234_MOESM311_ESM.pdf [file 41592_2017_BFnmeth4234_MOESM311_ESM.pdf]

## SUPPLEMENTAL INFORMATION 1.

### Amino acid and DNA sequences of constructs used in this study.

#### A. CMV IE94::TM-CIBN-NES-TEV-N-AsLOV2-tTA-SV40pA (6756 bp)

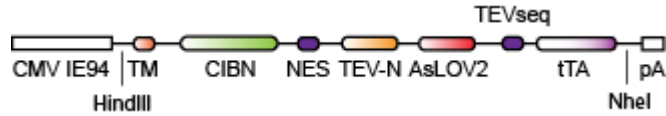

#### Amino acid sequence

METDTHLLWVLLLWVPGSTGDEQKLISEEDLNAVGGDTQEVIVVPHSLPFKVVVISAILALVVLTIISLILIM  
LWQKKPRGGSGGLEGMNGAIGDLLLLNFPDMSVLERQRAHLKYLNPFDSPLAGFFADSSMITGGEMDSY  
LSTAGLNLPMMYGETTVEGDSRLSISPETTLGTGNFKAAKFDTETKDCNEAAKKMTMNRDDLVEEGEEBK  
SKITEQNNGSTKSIKKMKHKAKKEENNFSNDSSKVTKELEKTDYIHACGGGGSGGGGSGGGGRSGGSMQLQ  
LPPLERLTLLEMGESLFKGPDRDYNPISSTICHLTNEVDGHTTSLYIGIFGPFITNKHLFRRNNGTLLVQSLHGV  
FKVKNTTTLQQLIDGRDMIIRMPKDFPPFPQKLKFRPQREERICLVTTNFQELGSGSGEFLATTLERIEKN  
FVITDPRLPDNPFIASDSFLQLTEYSREEILGRNCRFLQGPETDRATVRKIRD AIDNQTEVTVQLINYTKSGK  
KFWNVFHLQPMRDYKGDVQYFIGVQLDGERLHGAAREAVCLIKKTAFAQIAENLYFQGSRLDKSKVINS  
ALELLNEVGIEGLTTRKLAQKLGVEQPTLYWHVKNKRALLDALAIEMDRHHTHFCPLEGESWQDFLRNN  
AKSFRCALLSHRDGAKVHLGTRPTEKQYETLENQLAFLCQQGFSLENALYALS AVGHFTLGCVLEDQEHQ  
VAKEERETPTTDSMPLLRQAIELFDHQGAEPFLFGLLELICGLEKQLKCESGSAYSRARTKNNYGSTIEGL  
LDLPDDDAPEEAGLAAPRLSFLPAGHTRRLSTAPPTDVS LGDELHLDGEDVAMAHADALDDFDLMDLGDG  
DSPGPGFTPHDSAPYGALDMADFEFEQMFTDALGIDEYGG\*

#### DNA sequence

ATGGAGACAGACACACTCCTGCTATGGGTACTGCTGCTCTGGGTTCCAGGTTCCACTGGTGACGAACA  
AAAACATCTCAGAAGAGGATCTGAATGCTGTGGGCCAGGACACGCAGGAGGTCATCGTGGTGCCA  
CACTCCTTGCCCTTAAGGTGGTGGTATCTCAGCCATCCTGGCCCTGGTGGTGCTCACCATCATCTCC  
CTTATCATCCTCATCATGCTTTGGCAGAAGAAGCCACGTGGTGGCTCTGGAGGTCTCGAGGGAATGAA  
TGGAGCTATAGGAGGTGACCTTTTGTCAATTTTCTGACATGTCCGTCCTAGAGCGCCAAAGGGCTC  
ACCTCAAGTACCTCAATCCCACCTTTGATTCTCCTCTCGCCGGCTTCTTTGCCGATTCTTCAATGATTAC  
CGGCGGCGAGATGGACAGCTATCTTTCGACTGCCGTTTGAATCTTCCGATGATGTACGGTGAGACGA  
CGGTGGAAGGTGATTCAAGACTCTCAATTTCCGCCGAAACGACGCTTGGGACTGGAAATTTCAAGGCA  
GCGAAGTTTGATACAGAGACTAAGGATTGTAATGAGGCGGCGAAGAAGATGACGATGAACAGAGATG  
ACCTAGTAGAAGAAGGAGAAGAAGAGAAGTCGAAAATAACAGAGCAAAACAATGGGAGCACAAAAA  
GCATCAAGAAGATGAAACACAAAGCCAAGAAAGAAGAGAACAATTTCTCTAATGATTCATCTAAAGT  
GACGAAGGAATTGGAGAAAACGGATTATATTCATGCATGCGGTGGCGGTGGCTCTGGAGGTGGTGGG  
TCCGGAGGAGGCGCCGCTCCGGTGGATCCATGTTCAACTTCTCTCTTGAACGTCTTACTCTCGAG  
ATGGGCGAGAGCCTGTTCAAGGGACCTAGGGACTACAACCTATCAGTAGCACAATTTGTCACTCGAC  
CAACGAGAGTGATGGCCACACAACAAGCCTGTACGGCATCGGGTTCGGACCCTTTATCATCACCAACA  
AGCACCTGTTTCAGGCGGAATAATGGCACTCTGCTGGTGCAGAGCCTGCACGGGGTGTCAAAGTGAAG  
AACACAACCCTCTGCAGCAGCACCTGATCGATGGGCGGGATATGATCATCATTAGGATGCCCAAGGA  
CTTCCCCCTTTTCTCAGAAACTGAAGTTCCGAGAGCCCCAGAGAGAGGAGAGAATCTGTCTGGTGA  
CCACAAACTTTTCAGGAGCTCGGTAGTGGTAGTGGGGAGTTTCTGGCAACCACACTGGAACGGATCGAG  
AAAAATTTCTGTGATTACTGATCCGAGACTGCCTGACAACCAATCATTTTTTGCAGGCGATTCTTCTCTG  
CAGCTGACAGAATATTCTCGGGAAGAGATCCTGGGGCGCAATTGCCGTTTTCTGCAGGGACCCGAGAC  
AGACCGTGCCACTGTTCCGAAAATCAGAGATGCTATTGACAACCAGACTGAAGTGACCGTTCAGCTGA  
TCAATTATACCAAGAGCGGCAAGAAGTTCTGGAACGTGTTCCACCTGCAGCCGATGCGCGATTATAAG

GGCGACGTCCAGTACTTCATTGGCGTGCAGCTGGATGGCACCGAACGTCTTCATGGCGCCGCTGAGCG  
TGAGGCGGTCTGCCTGATCAAAAAGACAGCCTTTCAGATTGCTGAGAACCTGTACTTCCAGGGCTCTA  
GATTAGATAAAAAGTAAAGTGATTAACAGCGCATTAGAGCTGCTTAATGAGGTCGGAATCGAAGGTTAA  
ACAACCCGTAAACTCGCCAGAAGCTAGGTGTAGAGCAGCCTACATTGTATTGGCATGTAAAAAATAA  
GCGGGCTTTGCTCGACGCCTTAGCCATTGAGATGTTAGATAGGCACCATACTCACTTTTGCCTTTAGA  
AGGGGAAAGCTGGCAAGATTTTTTACGTAATAACGCTAAAAGTTTTAGATGTGCTTTACTAAGTCATC  
GCGATGGAGCAAAAAGTACATTTAGGTACACGGCCTACAGAAAAACAGTATGAAACTCTCGAAAATCA  
ATTAGCCTTTTTATGCCAACAAGGTTTTTCACTAGAGAATGCATTATATGCACTCAGCGCTGTGGGGCA  
TTTTACTTTAGGTTGCGTATTGGAAGATCAAGAGCATCAAGTCGCTAAAGAAGAAAGGGAAACACCTA  
CTACTGATAGTATGCCGCCATTATTACGACAAGCTATCGAATTATTTGATCACCAAGGTGCAGAGCCA  
GCCTTCTTATTCGGCCTTGAATTGATCATATGCGGATTAGAAAAACAACCTTAAATGTGAAAGTGGGTC  
CGGTACAGCCGCGCGGTACGAAAAACAATTACGGGTCTACCATCGAGGGCCTGCTCGATCTCCCGG  
ACGACGACGCCCCGAAGAGGCGGGGCTGGCGGCTCCGCGCCTGTCCTTTCTCCCGCGGGACACAG  
CGCAGACTGTCGACGGCCCCCGACCGATGTCAGCCTGGGGACGAGCTCCACTTAGACGGCGAGG  
ACGTGGCGATGGCGCATGCCGACGCGTACGACGATTTCGATCTGGACATGTTGGGGGACGGGGATTCC  
CCGGTCCGGGATTTACCCCCACGACTCCGCCCCCTACGGCGCTCTGGATATGGCCGACTTCGAGTTT  
GAGCAGATGTTACCGATGCCCTTGGAAATTGACGAGTACGGTGGGTAG

## B. CMV IE94::NES-CRY2PHR-TEV-C-SV40Pa

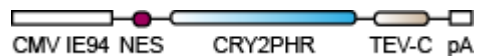

### Amino acid sequence

LQLPPLERLTL~~LEAT~~MKMDKKTIVWFRRLRIEDNPALAAAHEGSVFPVFIWCPEE~~EQFY~~PGRASRWWM  
KQSLAHL~~SQSL~~KALGSDLTLIKTHNTISAILDCIRVTGATKVVFNHLYDPVSLVRDHTVKEKLV~~ERGIS~~VQS  
YNGDLLYEPWEIYCEKGPFTSFNSYWKCLDMSIESVMLPPWRLMPITAAAEAIWACSIEELGLENEAE  
KPSNALLTRAWSPGWSNADKLLNEFIEKQLIDYAKNSKKVVGNSLSPYLHFGEISVRHVFQCARMKQII  
WARDKNSEGEESADLFLRGIGLREYSRYICFNFPF~~THEQ~~SLLSHLRFFPWDADVDKFKAWRQRTGYPLVD  
AGMRELWATGWMHNRIRVIVSSFAVKFLLLPWKWGMKYFWD~~TLLDADLECDILGWQYISGSIPDGHELD~~  
RLDNPALQGAKYDPEGEYIRQWLP~~ELARLPTEWI~~HHPWDAPLTVLKASGVELGTNYAKPIVDIDTARELLA  
KAISRTREAQIMIGAA~~LQELGGGRSGGGG~~STKS~~MSSMVS~~DTSCFPSSDGIFWKHWIQTKD~~GQC~~GSPLVS  
TRDGFIVGIHSASNFTNTNNYFTSVPKNFMELLTNQEAQ~~QWVSGWRLNADSVLWGGHKV~~FMV

### DNA sequence

ATG~~CTTCAACTTCCTCCTCTTGAACGTCTTACTCTC~~GAGGCCACCATGAAGATGGACAAAAAGACTATA  
GTTTGGTTT~~AGAA~~GAGACCTAAGGATTGAGGATAATCCTGCATTAGCAGCAGCTGCTCACGAAGGATC  
TGTTTTCTGTCTTCATTTGGTGTCTTGAAGAAGAAGGACAGTTTTATCCTGGAAGAGCTTCAAGATG  
GTGGATGAAACAATCACTTGCTCACTTATCTCAATCTTGAAGGCTCTTGGATCTGACCTCACTTTAAT  
CAAAACCCCAACACGATTTACGCGATCTTGGATTGTATCCGCGTTACCGGTGCTACAAAAGTCTCTT  
TAACCACCTCTATGATCCTGTTTCGTTAGTTTCGGGACCATACCGTAAAGGAGAAGCTGGTGGAAAGCTG  
GGATCTCTGTGCAAAGCTACAATGGAGATCTATTGTATGAACCGTGGGAGATATACTGCGAAAAGGGC  
AAACCTTTTACGAGTTTCAATTCTTACTGGAAGAAATGCTTAGATATGTCGATTGAATCCGTTATGCTT  
CCTCCTCCTTGGCGGTTGATGCCAATAACTGCAGCGGCTGAAGCGATTTGGGCGTGTTCGATTGAAGA  
ACTAGGGCTGGAGAATGAGGCCGAGAAACCGAGCAATGCGTTGTAACTAGAGCTTGGTCTCCAGGA  
TGGAGCAATGCTGATAAGTTACTAAATGAGTTCATCGAGAAGCAGTTGATAGATTATGCAAAGAACAG  
CAAGAAAGTTGTTGGGAATTCTACTTCACTACTTTCTCCGTATCTCCATTTCCGGGAAATAAGCGTCAG

ACACGTTTTCCAGTGTGCCCGGATGAAACAAATTATATGGGCAAGAGATAAGAACAGTGAAGGAGAA  
GAAAGTGCAGATCTTTTTCTTAGGGGAATCGGTTTAAGAGAGTATTCTCGGTATATATGTTTCAACTTC  
CCGTTTACTCACGAGCAATCGTTGTTGAGTCATCTTCGGTTTTTCCCTTGGGATGCTGATGTTGATAAGT  
TCAAGGCCTGGAGACAAGGCAGGACCGGTTATCCGTTGGTGGATGCCGGAATGAGAGAGCTTTGGGC  
TACCGGATGGATGCATAACAGAATAAGAGTGATTGTTTCAAGCTTTGCTGTGAAGTTTCTTCTCCTTCC  
ATGGAAATGGGGAATGAAGTATTTCTGGGATACACTTTTGGATGCTGATTTGGAATGTGACATCCTTG  
GCTGGCAGTATATCTCTGGGAGTATCCCCGATGGCCACGAGCTTGATCGCTTGGACAATCCCCGCGTTA  
CAAGGCGCCAAATATGACCCAGAAGGTGAGTACATAAGGCAATGGCTTCCCGAGCTTGCGAGATTGC  
CAACTGAATGGATCCATCATCCATGGGACGCTCCTTTAACCGTACTCAAAGCTTCTGGTGTGGAACCTCG  
GAACAAACTATGCGAAACCCATTGTAGACATCGACACAGCTCGTGAGCTACTAGCTAAAGCTATTTCA  
AGAACCCGTGAAGCACAGATCATGATCGGAGCAGCACTGCAGGAGCTCGGTGGAGGCGGCCGCTCCG  
GTGGCGGTGGCTCTACTAAGAGCATGTCCAGCATGGTGAGCGATACTAGCTGTACCTTCCCATCATCT  
GACGGAATCTTCTGGAAGCACTGGATTTCAGACTAAGGACGGCCAGTGTGGCAGCCCACTGGTGAGCA  
CACGAGACGGATTTCATCGTGGGATTTCACAGCGCCTCCAACCTTACAAACACCAATAACTATTTACC  
TCAGTGCCAAAGAACTTTATGGAGCTGCTGACCAACCAGGAGGCCACAGCTGGGTGAGCGGGTGGC  
GCCTGAACGCCGATTCCGTGCTGTGGGGCGGGCACAAAGTGTTTATGGTGTGA

### C. TRE::SEAP-SV40pA (5694 bp)

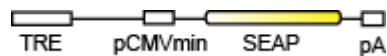

### Amino acid sequence

MLLLLLLGLRLQLSLGIIPVEEENPDFWNREAAEALGAAKKLQPAQTAAKNLIIFLDGMGVSTVTAARIL  
KGQKKDKLGPEIPLAMDRFPYVALSKTYNVDKHPVDSGATATAYLCGVKGNFQTIGLSAAARFNQCNTTR  
GNEVISVMNRKAKGKSVGVVTTTRVQHASPAGTYAHTVNRNWYSDADVPASARQEGCQDIATQLISNM  
DIDVILGGGRKYMFRMGTPDPEYPDDYSQGGTRLDGKNLVQEWLAKRQGARYVWNRTELMQASLDPSV  
THLMGLFEPGDMKYEIHRDSTLDPPLMEMTEAALRLLSRNPRGFFLFVEGGRIDHGHESRAYRALTETIM  
FDDAIERAGQLTSEEDTLSLVTADHSHVFSFGGYPLRGSSIFGLAPGKARDRKAYTVLLYGNPGYVLKDG  
ARPDVTESESGSPEYRQQSAVPLDEETHAGEDVAVFARGPQAHLVHGVQEQTFAHVMFAFAACLEPYTAC  
DLAPPAGTTD

### DNA sequence

TCCCTATCAGTGATAGAGAAAAGTGAAAGTCGAGTTTACCACTCCCTATCAGTGATAGAGAAAAGTGA  
AAGTCGAGTTTACCACTCCCTATCAGTGATAGAGAAAAGTGAAAGTCGAGTTTACCACTCCCTATCAG  
TGATAGAGAAAAGTGAAAGTCGAGTTTACCACTCCCTATCAGTGATAGAGAAAAGTGAAAGTCGAGT  
TTACCACTCCCTATCAGTGATAGAGAAAAGTGAAAGTCGAGTTTACCACTCCCTATCAGTGATAGAGA  
AAAGTGAAAGTCGAGTTTACCACTCCCTATCAGTGATAGAGAAAAGTGAAAGTCGAGTTTACCACTCC  
CTATCAGTGATAGAGAAAAGTGAAAGTCGAGTTTACCACTCCCTATCAGTGATAGAGAAAAGTGAAA  
GTCGAGTTTACCACTCCCTATCAGTGATAGAGAAAAGTGAAAGTCGAGTTTACCACTCCCTATCAGTG  
ATAGAGAAAAGTGAAAGTCGAGTTTACCACTCCCTATCAGTGATAGAGAAAAGTGAAAGTCGAGCTC  
GGTACGCTATGGCATGCATGTGTGCGGACCTGCAGGCCCTGAAGTTCATCTGCACCACCGGCAAGCTG  
CCCGTGCCCTGGCCACCTCGTGACCACCCTGACCTGGGGCGTGCAGTGCTTCGCCCGCTACCCCGAC  
CACATGAAGCAGCACGACTTCTTCAAGTCCGCCATGCCGAAGGCTACGTCCAGGAGCGCACCATCTT  
CTTCAAGGACGACGGCAACTACAAGACCCGCGCCGAGGTGAAGTTCGAGGGCGACACCCTGGTGAAC  
CGCATCGAGCTGAAGGGCATCGACTTCAAGGAGGACGGCAACATCCTGGGGCACAAGCTGGAGTACA  
ACGCCATCAGCGACAACGTCTATATCACCGCCGACAAGCAGAAGAACGGCATCAAGGCCAACTTCAA

GAGCTAGCCTATATAAGCAGAGCTCGTTTGTAGTAAACCGTCAGATCGCCTGGAGACGCCATCCACGCT  
 GTTTTGACCTCCATAGAAGACACCGGGACCGATCCAGCCTCCGCGGCCCGGTACCGAATTCAAGGCC  
 TCTCGAGATCCATTGTGCTGGATCTGCGATCTAAGTAAGCTTCGAATCGCGAATTCGCCACCATGCTG  
 CTGCTGCTGCTGCTGCTGGGCCTGAGGCTACAGCTCTCCCTGGGCATCATCCAGTTGAGGAGGAGAA  
 CCCGGACTTCTGGAACCGCGAGGCAGCCGAGGCCCTGGGTGCCGCCAAGAAGCTGCAGCCTGCACAG  
 ACAGCCGCCAAGAACCCTCATCATCTTCCTGGGCGATGGGATGGGGGTGTCTACGGTGACAGCTGCCAG  
 GATCCTAAAAGGGCAGAAGAAGGACAAACTGGGGCCTGAGATACCCCTGGCCATGGACCGCTTCCCA  
 TATGTGGCTCTGTCCAAGACATACAATGTAGACAAACATGTGCCAGACAGTGGAGCCACAGCCACGGC  
 CTACCTGTGCGGGGTCAAGGGCAACTTCCAGACCATTGGCTTGAGTGCAGCCGCCCGCTTTAACCAGT  
 GCAACACGACACGCGGCAACGAGGTTCATCTCCGTGATGAATCGGGCCAAGAAAGCAGGGAAGTCACT  
 GGGAGTGGTAACCACCACACGAGTGCAGCACGCCTCGCCAGCCGGCACCTACGCCACACGGTGAAC  
 CGCAACTGGTACTCGGACGCCGACGTGCCTGCCTCGGCCCGCCAGGAGGGGTGCCAGGACATCGCTAC  
 GCAGCTCATCTCCAACATGGACATTGACGTGATCCTAGGTGGAGGCCGAAAGTACATGTTTCGCATGG  
 GAACCCAGAACCTGAGTACCCAGATGACTACAGCCAAGGTGGGACCAGGCTGGACGGGAAGAATCT  
 GGTGCAGGAATGGCTGGCGAAGCGCCAGGGTGCCTGGTATGTGTGGAACCGCACTGAGCTCATGAG  
 GCTTCCCTGGACCCGTCTGTGACCCATCTCATGGGTCTCTTTGAGCCTGGAGACATGAAATACGAGATC  
 CACCGAGACTCCACACTGGACCCCTCCCTGATGGAGATGACAGAGGCTGCCCTGCGCCTGCTGAGCAG  
 GAACCCCGCGGCTTCTTCTCTTCGTGGAGGGTGGTCGCATCGACCATGGTCATCATGAAAGCAGGG  
 CTTACCGGGCACTGACTGAGACGATCATGTTTCGACGACGCCATTGAGAGGGCGGGCCAGCTCACCAGC  
 GAGGAGGACACGCTGAGCCTCGTCACTGCCGACCACTCCCACGTCTTCTCCTTCGGAGGCTACCCCT  
 GCGAGGGAGCTCCATCTTCGGGCTGGCCCTGGCAAGGCCCGGGACAGGAAGGCCTACACGGTCTCTCC  
 TATACGAAACGGTCCAGGCTATGTGCTCAAGGACGGCGCCCGCCGGATGTTACCGAGAGCGAGAG  
 CGGGAGCCCCGAGTATCGGCAGCAGTCAGCAGTGCCTGGACGAAGAGACCCACGCAGGCGAGGAC  
 GTGGCGGTGTTTCGCGCGCGGCCCGCAGGCGCACCTGGTTCACGGCGTGCAGGAGCAGACCTTCATAGC  
 GCACGTATGGCCTTCGCCGCTGCCTGGAGCCCTACACCGCCTGCGACCTGGCGCCCCCGCCGGCA  
 CCACCGAC

**D. TRE::EGFP-SV40pA (4855 bp)**

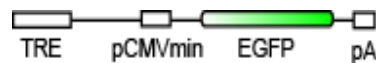

**N. pAAV TRE::EGFP-WPRE-bGHpA (5093 bp)**

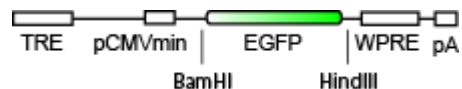

**Amino acid sequence**

MVSKGEELFTGVVPIVELDGDVNGHKFSVSGEGEGDATYGKLTCLKFICTTGKLPVPWPTLVTTLTLYGVQC  
 FSRYPDHMKQHDFFKSAMPEGYVQERTIFFKDDGNYKTRAEVKFEGDTLVNRIELKGIDFKEDGNILGHKL  
 EYNYNSHNVIYIMADKQKNGIKVNFKIRHNIEDGSVQLADHYQQNTPIGDGPVLLPDNHYLSTQSALS KDPN  
 EKRDHMVLLFVTAAGITLGMDELYK\*

**DNA sequence**

TCGAGTTTACCACTCCCTATCAGTGATAGAGAAAAGTGAAAGTCGAGTTTACCACTCCCTATCAGTGA  
 TAGAGAAAAGTGAAAGTCGAGTTTACCACTCCCTATCAGTGATAGAGAAAAGTGAAAGTCGAGTTTAC  
 CACTCCCTATCAGTGATAGAGAAAAGTGAAAGTCGAGTTTACCACTCCCTATCAGTGATAGAGAAAAG  
 TGAAAGTCGAGTTTACCACTCCCTATCAGTGATAGAGAAAAGTGAAAGTCGAGTTTACCACTCCCTAT  
 CAGTGATAGAGAAAAGTGAAAGTCGAGTTTACCACTCCCTATCAGTGATAGAGAAAAGTGAAAGTCG

AGTTTACCACTCCCTATCAGTGATAGAGAAAAGTGAAAGTCGAGTTTACCACTCCCTATCAGTGATAG  
 AGAAAAGTGAAAGTCGAGTTTACCACTCCCTATCAGTGATAGAGAAAAGTGAAAGTCGAGTTTACCA  
 TCCCTATCAGTGATAGAGAAAAGTGAAAGTCGAGTTTACCACTCCCTATCAGTGATAGAGAAAAGTGA  
 AAGTCGAGCTCGGTACGCTATGGCATGCATGTGTGCGCACCTGCAGGCCCTGAAGTTCATCTGCACCA  
 CCGGCAAGCTGCCCGTGCCTGGCCACCCTCGTGACCACCCTGACCTGGGGCGTGAGTGTTCGCC  
 CGTACCCCGACCACATGAAGCAGCAGACTTCTTCAAGTCCGCCATGCCCGAAGGCTACGTCCAGGA  
 GCGCACCATCTTCTTCAAGGACGACGGCAACTACAAGACCCGCGCCGAGGTGAAGTTCGAGGGCGAC  
 ACCCTGGTGAACCGCATCGAGCTGAAGGGCATCGACTTCAAGGAGGACGGCAACATCCTGGGGCACA  
 AGCTGGAGTACAACGCCATCAGCGACAACGTCTATATCACCGCCGACAAGCAGAAGAACGGCATCAA  
 GGCCAACTTCAAGAGCTAGCCTATATAAGCAGAGCTCGTTTGTAGTGAACCGTCAGATCGCCTGGAGAC  
 GCCATCCACGCTGTTTTGACCTCCATAGAAGACACCGGGACCGATCCAGCCTCCGCGGCCCGGTACC  
 GAATTC AAGGCCTCTCGAGCCTCTAGAAGGTGGCGGAATGGT GAGCAAGGGCGAGGAGCTGTTACC  
 GGGGTGGTGCCATCCTGGTTCGAGCTGGACGGCGACGTAACGGCCACAAGTTCAGCGTGTCCGGCG  
 AGGGCGAGGGCGATGCCACCTACGGCAAGCTGACCCTGAAGTTCATCTGCACCACGGCAAGCTGCC  
 GTGCCCTGGCCACCCTCGTGACCACCCTGACCTACCGCGTGCAGTGTTCAGCCGCTACCCCGACCA  
 CATGAAGCAGCAGCACTTCTTCAAGTCCGCCATGCCCGAAGGCTACGTCCAGGAGCGCACCATCTTCT  
 TCAAGGACGACGGCAACTACAAGACCCGCGCCGAGGTGAAGTTCGAGGGCGACACCCTGGTGAACCG  
 CATCGAGCTGAAGGGCATCGACTTCAAGGAGGACGGCAACATCCTGGGGCACAAGCTGGAGTACAAC  
 TACAACAGCCACAACGTCTATATCATGGCCGACAAGCAGAAGAACGGCATCAAGGTGAACTTCAAGA  
 TCCGCCACAACATCGAGGACGGCAGCGTGCAGCTCGCCGACCACTACCAGCAGAACACCCCATCGG  
 CGACGGCCCCGTGCTGCTGCCCGACAACCACTACCTGAGCACCCAGTCCGCCCTGAGCAAAGACCCCA  
 ACGAGAAGCGCGATCACATGGTCTGCTGGAGTTCGTGACCGCCCGGGATCACTCTCGGCATGGAC  
 GAGCTGTACAAGTAG

**E. CMV IE94::DRD2-V2tail-CIBN-BLITz-1-tTA-SV40Pa (7404 bp)**

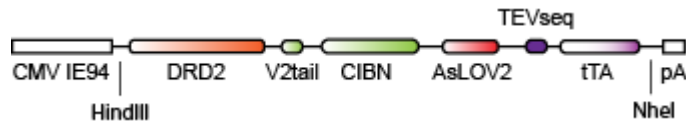

**Amino acid sequence**

MKTIIALS YIFCLV FADYK DDDDDASMDPLNLSWYDDDLERQNW SRPFNGSE GKADRPHYNY AMLLTL LI  
 FIIVFGNVLV CMAVSREKALQ TTTNYLIVSLAVADLLVATLVMPWVVYLEVVG EWKFSRIHCDIFVTL DV  
 MMCTASILNLCAISIDRYTAVAMPMLYNTRYSSKRRVTVMIAIVWVLSFTISCP LLFGLNNTDQNECIANP  
 AFVVYSSIVSFYVPFIVTLLVYIKIYIVLRKRRKR VNTKRSSRAFRANLKTPLKGNCTHPEDMKLCTVIMKSN  
 GSPVNRRRMDAARRAQELEMELSSSTSPPERTRYSPIPP SHHQLTLPDPSHHGLHSNP DSPAKPEKNGHAK  
 IVNPRIAKFFEIQTMPNGKTRTSLK TMSRRKLSQQKEK KATQMLAIVLGVFIICWLPFFITHILNIHCDNIPP  
 VLYSAFTWLG YVNSAVNPIIYTTFNIEFRKAFMKILHCEFGRTPPSLG PQDESCTTASSSLAKDTSS LQLPPL E  
 RLTLGGSGGLEGGMNGAIGG DLLLNFDPMSVLERQRAHLKYL NPTFDSPLAGFFADSSMITGGEMDSYLS T  
 AGLNLPMMYGETTVEGDSRLSISPETTLGTGNFKKRKFD TETKDCNEKKKKMTMNRDDLVEEGEEESKI  
 TEQNGSTKSIKMKHKAKKEENNFSNDSSKVTK ELEKTDYIHGGGSGGGSGGGGACGSGSGEFLATT  
 LERIEKNFVITDPRLPDNP IIFASDSFLQLTEYSREEILGRNCRFLQGPETDRATVRKIRDAIDNQT ETVVQLIN  
 YTKSGKKFWNVFHLQPMRDYKGDVQYFIVG VQLDGT ERLHGAEREAVCLIKKTA FQIAENLYFQGSRLDK  
 SKVINSALELLNEVGIEGLTTRKLAQKLGVEQPTLYWHVKNKRALLDALAIEM LDRHHTHFCPLEGESWQ  
 DFLRNNAKSFRCALLSHRDGAKVHLGTRPTEKQYETLENQLAFLCQQGFSLENALYALS AVGHFTLGCVL  
 EDQEHQVAKEERETPTTDSMPPLLRQAIELFDHQGAEP AFLFGLELIICGLEKQLKCESGSEFDALDDFDL D  
 MLGSDALDDFDL DMLGSDALDDFDL DMLGSDALDDFDL DML\*

## DNA sequence

ATGAAGACGATCATCGCCCTGAGCTACATCTTCTGCCTGGTATTGCGCCGACTACAAGGACGATGATGA  
CGCCAGCATGGATCCACTGAACTGTCCTGGTACGATGACGATCTGGAGAGGCAGAACTGGAGCCGG  
CCCTTCAATGGGTCAGAAGGGAAGGCAGACAGGCCCACTACA ACTACTATGCCATGCTGCTCACCCCT  
CCTCATCTTTATCATCGTCTTTGGCAATGTGCTGGTGTGCATGGCTGTATCCCGAGAGAAGGCTTTGCA  
GACCACCACCACTACTTGATAGTCAGCCTTGCTGTGGCTGATCTTCTGGTGGCCACACTGGTAATGCC  
GTGGGTTGTCTACCTGGAGGTGGTGGGTGAGTGGAAATTCAGCAGGATTCACTGTGACATCTTTGTCA  
CTCTGGATGTCATGATGTGCACAGCAAGCATCCTGAACTGTGTGCCATCAGCATTGACAGGTACACA  
GCTGTGGCAATGCCCATGCTGTATAACACACGCTACAGCTCCAAGCGCCGAGTTACTGTGATGATTGC  
CATTGTCTGGGTCTGTCCTTACCATCTCCTGCCACTGCTCTTCGGACTCAACAATACAGACCAGAA  
TGAGTGTATCATTGCCAACCCCTGCCTTTGTGGTCTACTCCTCCATTGTCTCATTCTACGTGCCCTTCAT  
GTCACTCTGTGTTCTATATCAAAATCTACATCGTCTCCTCCGGAAGCGCCGGAAGCGGGTCAACACCAA  
GCGCAGCAGTCGAGCTTTCAGAGCCAACCTGAAGACACCCTCAAGGGCAACTGTACCCACCCTGAG  
GACATGAAACTCTGCACCGTTATCATGAAGTCTAATGGGAGTTTCCAGTGAACAGGCGGAGAATGGA  
TGCTGCCCGCCGAGCTCAGGAGCTGGAAATGGAGATGCTGTCAAGCACCAGTCCCCCAGAGAGGACC  
CGGTATAGCCCCATCCCTCCAGTCAACCACCAGCTCACTCTCCCTGATCCATCCCACCACGGCCTACAT  
AGCAACCCTGACAGTCTGCCAAACCAGAGAAGAATGGGCACGCCAAGATTGTCAATCCCAGGATTG  
CCAAGTTCTTTGAGATCCAGACCATGCCAATGGCAAACCCGGACCTCCCTTAAGACGATGAGCCGC  
AGAAAGCTCTCCAGCAGAAGGAGAAGAAAGCCACTCAGATGCTTGCCATTGTTCTCGGTGTGTTTAT  
CATCTGCTGGCTGCCCTTCTTCATCACGCACATCCTGAATATACACTGTGATTGCAACATCCCACCAGT  
CCTCTACAGCGCCTTACATGGCTGGGCTATGTCAACAGTGCCGTCAACCCCATCATCTACACCACCTT  
CAACATCGAGTTCGCAAGGCCTTCATGAAGATCTTGCACTGCGAATTCGGACGCACCCACCCAGCC  
TGGTCCCCAAGATGAGTCCTGCACCACCGCCAGCTCCTCCCTGGCCAAGGACACTTCATCGCTCAA  
CTTCTCCTCTTGAACGTCTTACTCTCGGTGGCTCTGGAGGTCTCGAGGGTGGCATGAATGGAGCTATA  
GGAGGTGACCTTTTGTCAATTTTCTGACATGTCGGTCTAGAGCGCCAAAGGGCTCACCTCAAGTAC  
CTCAATCCCACCTTTGATTCTCCTCTCGCCGGCTTCTTTGCCGATTCTTCAATGATTACCGGCGGCGAGA  
TGGACAGCTATCTTTCGACTGCCGGTTTGAATCTTCCGATGATGTACGGTGAGACGACGGTGGAAAGGT  
GATTCAAGACTCTCAATTTCCCGCGAAACGACGCTTGGGACTGGAAATTTCAAGAAACGGAAGTTTGA  
TACAGAGACTAAGGATTGTAATGAGAAGAAGAAGATGACGATGAACAGAGATGACCTAGTAGA  
AGAAGGAGAAGAAGAGAAGTCGAAAATAACAGAGCAAAACAATGGGAGCACAAAAGCATCAAGAA  
GATGAAACACAAAGCCAAGAAAGAAGAGAACAATTTCTCTAATGATTTCATCTAAAGTGACGAAGGAA  
TTGGAGAAAACGGATTATATTCATGGTGGCGGTGGCTCTGGAGGTGGTGGGTCCGGAGGAGGCGCGC  
CATGCGGTAGTGGTAGTGGGGAGTTTCTGGCAACCACACTGGAACGGATCGAGAAAAATTCGTGATT  
ACTGATCCGAGACTGCCTGACAACCCAATCATTTTTCGAGCGATTCTTCTCAGCTGACAGAATAT  
TCTCGGGAAGAGATCCTGGGGCGCAATTGCCGTTTTCTGCAGGGACCCGAGACAGACCCGTGCCACTGT  
TCGGAAAATCAGAGATGCTATTGACAACCAGACTGAAGTGACCGTTCAGCTGATCAATTATACCAAGA  
GCGGAAGAAGTTCTGGAACGTGTTCCACCTGCAGCCGATGCGCGATTATAAGGGCGACGTCCAGTAC  
TTCATTGGCGTGACGCTGGATGGCACCGAACGTCTTCATGGCGCCGCTGAGCGTGAGGCGGTCTGCCT  
GATCAAAAAGACAGCCTTTCAGATTGCTGAGAACCTGTACTTCCAGGGCTCTAGATTAGATAAAAAGTA  
AAGTGATTAACAGCGCATTAGAGCTGCTTAATGAGGTGCGAATCGAAGGTTTAACAACCCGTAAACTC  
GCCAGAAGCTAGGTGTAGAGCAGCCTACATTGTATTGGCATGTA AAAAATAAGCGGGCTTTGCTCGA  
CGCCTTAGCCATTGAGATGTTAGATAGGCACCATACTCACTTTTGGCCTTTAGAAGGGGAAAGCTGGC  
AAGATTTTTTACGTAATAACGCTAAAAGTTTTAGATGTGCTTTACTAAGTCATCGCGATGGAGCAAAA  
GTACATTTAGGTACACGGCCTACAGAAAAACAGTATGAAACTCTCGAAAATCAATTAGCCTTTTTATG  
CCAACAAGGTTTTTCACTAGAGAATGCATTATATGCACTCAGCGCTGTGGGGCATTCTTACTTTAGGTTG  
CGTATTGGAAGATCAAGAGCATCAAGTCGCTAAAGAAGAAAGGGAAACACCTACTACTGATAGTATG  
CCGCCATTATTACGACAAGCTATCGAATTATTTGATCACAAGGTGCAGAGCCAGCCTTCTTATTCCGC  
CTTGAATTGATCATATGCGGATTAGAAAAACA ACTTAAATGTGAAAGTGGGTCCGAATTCGACGCATT  
GGACGATTTTGTGATCTGGATATGCTGGGAAGTGACGCCCTCGATGATTTTACCTTGACATGCTTGGTTC  
GGATGCCCTTGATGACTTTGACCTCGACATGCTCGGCAGTGACGCCCTTGATGATTTTCGACCTGGACAT  
GCTGTAG

## F. CMV IE94::β-Arrestin2-TEV-N P2A TdTomato-SV40pA (7184 bp)

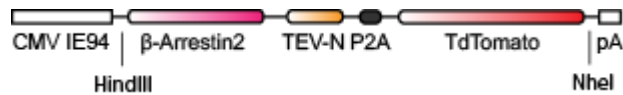

### Amino acid sequence

MGEKPGTRVFKKSSPNCKLTVYLGKRDFVDHLDKVDPVDGVVLVDPDYLKDRKVFVTLTCAFRYGRELD  
DVLGLSFRKDLFIATYQAFPPMPNPPRPPTRLQDRLLKKLGQHAHPFFFTIPQNLPCSVTLQPGPEDTGKACG  
VDFEIRAFCAKSIEEKSHKRNSVRLIIRKRVQFAPETPGPQPSAETTRHFLMSDRSLHLEASLDKELYHGEPE  
LNVNVHVTNNSAKTVKKIRVSVRQYADICLFSTAQYKCPVAQLEQDDQVSPSSTFCKVYTTITPLSDNREK  
RGLALDGQLKHEDTNLASSTIVKEGANKEVLGILVSYRVKVKLVVSRGGDVSVELPFVLMHPKPHDHITLP  
RPQSAPREIDIPVDTNLIEFDNTYATDDDIVFEDFARLRLKGMKDDDDCDDQFCLSSLEGGGGSGGGGGSGGG  
GIEGMGESLFGKPRDYNPISSTICHLTNESEDGHTTSLYGIGFGPFIITNKHLFRRNNGTLLVQSLHGVFKVKN  
TTTLQQHLIDGRDMIIRMPKDFPPFPQKLFREPQREERICLVTTNFQACGSGATNFSLLKQAGDVEENPGP  
EFMVSKGEEVIKEFMRFKVRMEGSMNGHEFEIEGEGEGRPYEGTQTAKLKVTKGGPLPFAWDILSPQFMY  
GSKAYVKHPADIPDYKLSFPEGFKWERVMNFEEDGGLVTVTQDSSLQDGTLYKVKMRGTFNPPDGPVM  
QKKTMGWEASTERLYPRDGVKGEIHQALKLDGGRYLVEFKTIYMAKKPVQLPGYYYYVDTKLDITSHN  
EDYTIVEQYERSEGRHHLFLGHGTGSTGSGSSGTASSEDNNMAVIKEFMRFKVRMEGSMNGHEFEIEGEGE  
GRPYEGTQTAKLKVTKGGPLPFAWDILSPQFMYGSKAYVKHPADIPDYKLSFPEGFKWERVMNFEEDGGL  
VTVTQDSSLQDGTLYKVKMRGTFNPPDGPVMQKKTMGWEASTERLYPRDGVKGEIHQALKLDGGRYL  
LVEFKTIYMAKKPVQLPGYYYYVDTKLDITSHNEDYTIVEQYERSEGRHHLFLYGMDEL<sup>\*</sup>YK

### DNA sequence

ATGGGTGAAAAACCCGGGACCAGGGTCTTCAAGAAGTCGAGCCCTAACTGCAAGCTCACCGTGTACTT  
GGCAAGCGTGACTTTGTGGATCACTTGGACAAAGTGGATCCTGTGCGATGGTGTGGTGTCTTGTGGATC  
CTGACTACTTGAAGGACCGGAAAGTGTGGTGGACCTCACCTGTGCCTTCCGCTATGGCCGAGAAGAC  
CTGGATGTACTGGGCTGTCTTTCCGCAAAGATCTGTTCATCGCCACCTACCAGGCCTTCCCCCCCATG  
CCCAACCCACCTCGGCCCCCACCAGCCTACAGGACCGACTGCTGAAGAAGTTGGGCCAGCATGCCCA  
CCCCTTTTTTTTCACAATACCCAGAATTTGCCTTGTCCGTCACTGCAGCCAGGACCGGAGGACAC  
AGGGAAGGCCTGTGGAGTAGACTTTGAGATTCGAGCCTTCTGTGCCAAATCTATAGAAGAAAAAGCC  
ACAAAAGGAACCTCCGTGCGGCTTATCATCAGAAAGGTACAGTTTGTCTCCTGAGACACCCGGCCCCAG  
CCATCAGCTGAAACACACGCCACTTCTCATGTCTGACCGAGGTCCTGCACCTAGAGGCTTCCCTG  
GACAAAGAGCTGTACTACCATGGGGAACCCCTCAATGTCAACGTCCACGTCACCAACAATTCTGCCAA  
GACCGTCAAGAAGATCAGAGTGTCTGTGAGACAGTATGCCGACATTTGCCTTTCAGCACCGCGCAGT  
ACAAGTGTCTGTGGCTCAGCTTGAACAAGATGACCAGGTGTCTCCAGTTCCACATTCTGCAAGGTG  
TACACCATAACCCCGCTGCTCAGTGACAACCGAGAGAAGCGTGGCCTTGCCCTTGATGGGCAACTCAA  
GCACGAAGACACCAACCTGGCTTCCAGCACCATTGTGAAGGAGGGAGCCAACAAGGAGGTGCTGGGA  
ATCCTAGTATCCTACAGGGTCAAGGTGAAGCTGGTGGTGTCTCGAGGCGGGGATGTCTCCGTGGAGCT  
ACCTTTCGTCTAATGCACCCCAAGCCCCACGACCACATCACCTTCCCCGACCCAGTCAGCCCCCG  
GGAAATAGACATCCCTGTGGATAACCAACCTCATTGAATTCGATACCAACTATGCCACAGACGACGACA  
TCGTGTTTGAGGACTTTGCGAGGCTTCCGGCTGAAGGGGATGAAGGATGACGACTGTGATGACCAGTTC  
TGCTGAGCTCACTCGAAGGTGGCGGTGGCTCTGGAGGTGGTGGGTCCGGAGGAGGCGGCATCGAGG  
GTATGGGCGAGAGCCTGTTCAAGGGACCTAGGGACTACAACCCTATCAGTAGCACAATTTGTACCTG  
ACCAACGAGAGTGATGGCCACACAACAAGCCTGTACGGCATCGGGTTCGGACCCTTTATCATCACCAA  
CAAGCACCTGTTCCAGGCGGAATAATGGCACTCTGCTGGTGCAGAGCCTGCACGGGGTGTTCAAAGTGA  
AGAACACAACCACTCTGCAGCAGCACCTGATCGATGGGCGGGATATGATCATCATTAGGATGCCCAA  
GACTTCCCCCTTTTCTCAGAACTGAAGTTCCGAGAGCCCCAGAGAGAGGAGAGAATCTGTCTGGT  
GACCACAAACTTTACGGCATGCGGAAGCGGAAGTACTAACTTCAGCCTGCTGAAGCAGGCTGGAGAC  
GTGGAGGAGAACCCTGGACCTGAATTCATGGTGAGCAAGGGCGAGGAGTTCATCAAAGAGTTCATGC  
GCTTCAAGGTGCGCATGGAGGGCTCCATGAACGGCCACGAGTTCGAGATCGAGGGCGAGGGCGAGGG

CCGCCCCCTACGAGGGCACCCAGACCGCCAAGCTGAAGGTGACCAAGGGCGGCCCCCTGCCCTTCGCCT  
 GGGACATCCTGTCCCCCAGTTCATGTACGGCTCCAAGGCGTACGTGAAGCACCCCGCCGACATCCCC  
 GATTACAAGAAGCTGTCCTTCCCCGAGGGCTTCAAGTGGGAGCGCGTGATGAACTTCGAGGACGGCGG  
 TCTGGTGACCGTGACCCAGGACTCCTCCCTGCAGGACGGCAGCTGATCTACAAGGTGAAGATGCGCG  
 GCACCAACTTCCCCCGACGGCCCCGTAATGCAGAAGAAGACCATGGGGCTGGGAGGCCTCCACCGA  
 GCGCCTGTACCCCGCGACGGCGTGCTGAAGGGCGGAGATCCACCAGGCCCTGAAGCTGAAGGACGGC  
 GGCCGCTACCTGGTGGAGTTCAAGACCATCTACATGGCCAAGAAGCCCGTGCAACTGCCCGGCTACTA  
 CTACGTGGACACCAAGCTGGACATCACCTCCCACAACGAGGACTACACCATCGTGGAACAGTACGAG  
 CGCTCCGAGGGCCGCCACCACCTGTTCTGGGGCATGGCACCGGCAGCACCCGGCAGCGGCAGTTCCGG  
 CACCGCCTCCTCCGAGGACAACAACATGGCCGTCATCAAAGAGTTCATGCGCTTCAAGGTGCGCATGG  
 AGGGTCCATGAACGGCCACGAGTTCGAGATCGAGGGCGAGGGCGAGGGCCGCCCTACGAGGGCAC  
 CCAGACCGCCAAGCTGAAGGTGACCAAGGGCGGCCCCCTGCCCTTCGCCTGGGACATCCTGTCCCCC  
 AGTTCATGTACGGCTCCAAGGCGTACGTGAAGCACCCCGCCGACATCCCCGATTACAAGAAGCTGTCC  
 TTCCCCGAGGCTTCAAGTGGGAGCGCGTGATGAACTTCGAGGACGGCGGTCTGGTGACCGTGACCCA  
 GGACTCCTCCCTGCAGGACGGCAGCTGATCTACAAGTGAAGATGCGCGGCACCAACTCCCCCGCGA  
 ACGCCCCGTAATGCAGAAGAAGACCATGGGCTGGGAGGCCCTCCACCGAGCGCCTGTACCCCCGCGA  
 CGGCGTGCTGAAGGGCGAGATCCACCAGGCCCTGAAGCTGAAGGACGGCGGCCGCTACCTGGTGGAG  
 TTCAAGACCATCTACATGGCCAAGAAGCCCGTGCAACTGCCCGGCTACTACTACGTGGACACCAAGCT  
 GGACATCACCTCCCACAACGAGGACTACACCATCGTGGAACAGTACGAGCGCTCCGAGGGCCGCCAC  
 CACCTGTTCTGTACGGCATGGACGAGCTGTACAAGTAG

**G. CMV IE94::DRD2-V2tail-TEV-N-BLITz-1-tTA-SV40pA (7428 bp)**

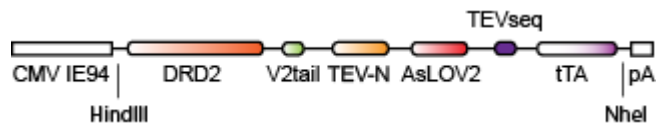

**L. pAAV hSYN::DRD2-V2tail-TEV-N-BLITz-1-tTA-bGHpA (7108 bp)**

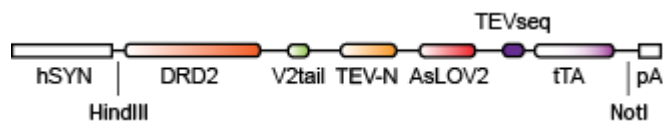

**Amino acid sequence**

MKTIIALS YIFCLVFADYKDDDDASMDPLNLSWYDDDLERQNWSRPFNGSE GKADRPHYNYYAMLLTLI  
 FIIVFGNVLVCM AVSREKALQTTTNYLIVSLAVADLLVATLVMPWVVYLEVVG EWKFSRIHCDIFVTLDV  
 MMCTASILNLCAISIDRYTAVAMPMLYNTRYSSKRRVTVMIAIVWVLSFTISCP LLFGLNNTDQNECIANP  
 AFVVYSSIVSFYVPFIVTLLVYIKIYIVLRKRRKR VNTKRSSRAFRANLKTPLKGNCTHPEDMKLCTVIMKSN  
 GSFVNRRRMDAARRAQELEMELMSSTSPPERTRYSP IPPSHHQLTLPDPSHHGLHSNPDSPAKPEKNGHAK  
 IVNPRIAKFFEIQTMPNGKTRTSLKTM SRRKLSQQKEKATQMLAIVLGVFIICWLPFFITHILNIHCDCNIPP  
 VLYSAFTWLG YVNSAVNPIIYTTFNIEFRKAFMKILHCEFRTPPSLGPQDESCTTASSSLAKDTSSLQLPPLE  
 RLTLGGSGGLEMGESLFGKPRDYNPISSTICHLT NESDGHTTSLYIGIFGPFITNKHLFRRNNGTLLVQSLH  
 GVFKVKNTTTLQQHLIDGRDMIIRMPKDFPPFPQKLKFREPQREERICLVTTNFQELGSGSGEFLATTLERIE  
 KNFVITDPRLPDNPIIFASDSFLQLTEYSREEILGRNCRFLQGPETDRATVRKIRDAIDNQTEVTVQLINYTKS  
 GKFAWNVFHLQPMRDYKGDVQYFIVG VQLDGTERTLHGAAREAVCLIKKTA FQIAENLYFQGSRLD KSVI  
 NSALELLNEVGIEHLTRKLAQKLGVEQPTLYWHVKNKRALLDALAIEM LDRHHTHFCPLEGESWQDFLR  
 NNAKSFRCALLSHRDGAKVHLGTRPTEKQYETLENQLAFLCQQGFSLENALYALS AVGHFTLGCVLEDQE  
 HQVAKEERETPTTDSMPPLLRQAIELFDHQGAEP AFLGLELIICGLEKQLKCESGSAYS RARTKNNYGSTIE



GLLDLPDDDAPEEAGLAAPRLSFLPAGHTRRLSTAPPTDVS LGDELHLDGEDVAMAHADALDDFDLMLG  
DGDSPGPGFTPHDSAPYGALDMADFEFEQMFTDALGIDEYGG\*

### DNA sequence

ATGAAGACGATCATCGCCCTGAGCTACATCTTCTGCCTGGTATTGCGCCGACTACAAGGACGATGATGA  
CGCCAGCATGGATCCACTGAACCTGTCCTGGTACGATGACGATCTGGAGAGGCAGAACTGGAGCCGG  
CCCTTCAATGGGTCAGAAGGGAAGGCAGACAGGCCCACTACA ACTACTATGCCATGCTGCTCACCCCT  
CCTCATCTTTATCATCGTCTTTGGCAATGTGCTGGTGTGCATGGCTGTATCCCGAGAGAAGGCTTTGCA  
GACCACCACCAACTACTTGATAGTCAGCCTTGCTGTGGCTGATCTTCTGGTGGCCACACTGGTAATGCC  
GTGGGTTGTCTACCTGGAGGTGGTGGGTGAGTGGAAATTCAGCAGGATTCACTGTGACATCTTTGTCA  
CTCTGGATGTCATGATGTGCACAGCAAGCATCCTGAACCTGTGTGCCATCAGCATTGACAGGTACACA  
GCTGTGGCAATGCCCATGCTGTATAACACACGCTACAGCTCCAAGCGCCGAGTTACTGTGATGATTGC  
CATTGTCTGGGTCTGTCCTTACCATCTCCTGCCACTGCTCTTCGGACTCAACAATACAGACCAGAA  
TGAGTGTATCATTGCCAACCCCTGCCTTTGTGGTCTACTCCTCCATTGTCTCATTCTACGTGCCCTTCATC  
GTCACTCTGCTGGTCTATATCAAAATCTACATCGTCTCCGGAAGCGCCGGAAGCGGGTCAACACCAA  
GCGCAGCAGTCGAGCTTTCAGAGCCAACCTGAAGACACCACTCAAGGGCAACTGTACCCACCCTGAG  
GACATGAAACTCTGCACCGTTATCATGAAGTCTAATGGGAGTTTCCAGTGAACAGGCGGAGAATGGA  
TGCTGCCCCGCCGAGCTCAGGAGCTGGAATGGAGATGCTGTCAAGCACCAGTCCCCCAGAGAGGACC  
CGGTATAGCCCCATCCCTCCAGTCACCACCAGCTCACTCTCCCTGATCCATCCCACCACGGCCTACAT  
AGCAACCCTGACAGTCTGCCAAACCAGAGAAGAATGGGCACGCCAAGATTGTCAATCCCAGGATTG  
CCAAGTTCTTTGAGATCCAGACCATGCCAATGGCAAAACCCGGACCTCCCTTAAGACGATGAGCCGC  
AGAAAGCTCTCCAGCAGAAGGAGAAGAAAGCCACTCAGATGCTTGCCATTGTTCTCGGTGTGTTTAT  
CATCTGCTGGCTGCCCTTCTTATCAGCACATCCTGAATATACACTGTGATTGCAACATCCCACCAGT  
CCTCTACAGCGCTTACATGGCTGGGCTATGTCAACAGTGGCGTCAACCCCATCATCTACACCACCTT  
CAACATCGAGTTCGCAAGGCCTTTCATGAAGATCTTGCCTGCGAATTCGGACGCACCCACCCAGCC  
TGGGTCCCAAGATGAGTCTTGCACCACCGCAGCTCCTCCCTGGCCAAGGACACTTCATCGCTTCAA  
CTTCTCTCTTGAACCTTACTCTCGGTGGCTCTGGAGGTCTCGAGATGGGCGAGAGCCTGTTCAAG  
GGACCTAGGGACTACAACCCTATCAGTAGCACAATTTGTACCTGACCAACGAGAGTGTGTTGCCACAC  
AACAAAGCCTGTACGGCATCGGGTTCGGACCTTTATCATACCAACAAGCACCTGTTTACGGCGGAATA  
ATGGCACTCTGCTGGTGCAGAGCCTGCACGGGGTGTTCAAAAGTGAAGAACAACCACTCTGCAGCAG  
CACCTGATCGATGGGCGGGATATGATCATCATTAGGATGCCCAAGGACTTCCCCCTTTTCTCAGAA  
ACTGAAGTTCGAGAGCCCCAGAGAGAGGAGAGAATCTGTCTGGTGACCACAACTTTTACGGAGCTC  
GGTAGTGGTAGTGGGAGTTTTCTGGCAACCACACTGGAACGGATCGAGAAAAATTTCTGTGATTACTGA  
TCCGAGACTGCCTGACAACCAATCATTTTTTGCGAGCGATTCTTCTGAGCTGACAGAATATTCTCG  
GGAAGAGATCCTGGGGCGCAATTGCCGTTTTCTGCAGGGACCCGAGACAGACCGTGGCACTGTTCCGA  
AAATCAGAGATGCTATTGACAACCAGACTGAAGTGACCGTTCAGCTGATCAATTATACCAAGAGCGGC  
AAGAAGTTCTGGAACGTGTTCCACCTGCAGCCGATGCGCGATTATAAGGGCGACGTCCAGTACTTCAT  
TGGCGTGCAGCTGGATGGCACC GAACGTCTTCATGGCGCCGCTGAGCGTGAGGCGGTCTGCCTGATCA  
AAAAGACAGCCTTTCAGATTGCTGAGAACCTGTACTTCCAGGGCTCTAGATTAGATAAAAAGTAAAGTG  
ATTAACAGCGCATTAGAGCTGCTTAATGAGGTCGGAATCGAAGGTTTAAACAACCCGTA AACTCGCCCA  
GAAGCTAGGTGTAGAGCAGCTACATTGTATTGGCATGTAAAAAATAAGCGGGCTTTGCTCGACGCT  
TAGCCATTGAGATGTTAGATAGGCACCATACTCACTTTTGCCCTTTAGAAAGGGGAAAGCTGGCAAGAT  
TTTTTACGTAATAACGCTAAAAGTTTTAGATGTGCTTTACTAAGTCATCGCGATGGAGCAAAAAGTACAT  
TTAGGTACACGGCCTACAGAAAAACAGTATGAAACTCTCGAAAAATCAATTAGCCTTTTTATGCCAACA  
AGTTTTTTTACTAGAGAATGCATTATATGCACTCAGCGCTGTGGGGCATTTTACTTTAGGTTGCGTATT  
GGAAGATCAAGAGCATCAAGTCGCTAAAGAAGAAAGGGAAACACCTACTACTGATAGTATGCCGCCA  
TTATTACGACAAGCTATCGAATTATTTGATCACCAAGGTGCAGAGCCAGCCTTCTTATTCGGCCTTGAA  
TTGATCATATGCGGATTAGAAAAACA ACTTAAATGTGAAAGTGGGTCCGCGTACAGCCGCGCGGTAC  
GAAAAACAATTACGGGTCTACCATCGAGGGCCTGCTCGATCTCCCGGACGACGACGCCCCGAAGAG  
GCGGGGCTGGCGGCTCCGCGCCTGTCTTTCTCCCCGCGGACACACGCGCAGACTGTCGACGGCCCC  
CCCGACCGATGTCAGCCTGGGGGACGAGCTCCACTTAGACGGCGAGGACGTGGCGATGGCGCATGCC  
GACGCGCTAGACGATTCGATCTGGACATGTTGGGGGACGGGGATTCCCCGGTCCGGGATTACCCC

CCACGACTCCGCCCCCTACGGCGCTCTGGATATGGCCGACTTCGAGTTTGAGCAGATGTTTACCGATGC  
CCTTGAATTGACGAGTACGGTGGGTAG

#### H. CMV IE94::β-Arrestin2-TEV-C P2A TdTomato-SV40pA (7121 bp)

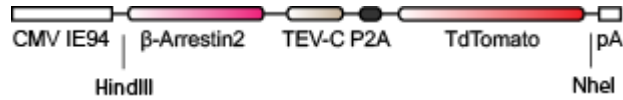

#### M. pAAV hSYN::β-Arrestin2-TEV-C P2A TdTomato-WPRE-bGHpA

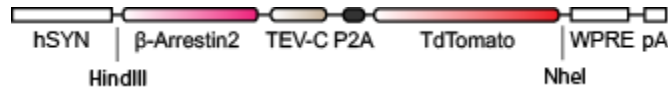

#### Amino acid sequence

MGEKPGTRVFKKSSPNCKLTVYLGKRDFVDHLDKVDVVDGVVLVDPDYLKDRKVFVTLTCAFRYGREDL  
DVLGLSFRKDLFIATYQAFPPMPNPPRPPTRLQDRLLKKGQHAHPFFFTIPQNLPCSVTLQPGPEDTGKACG  
VDFEIRAFCAKSIEEKSHKRNVSRLIIRKVVQFAPETPGPQPSAETTRHFLMSDRRSLHLEASLDKELYHGEF  
LNVNVHVTNNSAKTVKKIRVSVRQYADICLFSTAQYKCPVAQLEQDDQVSPSSTFCKVYTITPLLSDNREK  
RGLALDGQLKHEDTNLASSTIVKEGANKEVLGILVSYRVKVKLVVSRGGDVSVELPFVLMHPKPHDHITLP  
RPQSAPREIDIPVDTNLIEFDNTNYATDDDIVFEDFARLRLKGMKDDDCDDQFCLSSLEGGGGSGGGGGSGGG  
GIEMSSMVS DTSCTFPSSDGIFWKHWIQT KD GQC GSPLVSTRDGFIVGIHSASNFTNTN NYFTSVPKNFMEL  
LTNQEAQQWVSGWRLNADSVLWGGHKVFMACGSGATNFSLLKQAGDVEENPGPEFMVSKGEEVIKEFM  
RFKVRMEGSMNGHEFEIEGEGEGRPYEGTQTAKLKVTKGGPLPFAWDILSPQFMYGSKAYVKHPADIPDY  
KKLSFPEGFKWERVMNFEDGGLVTVTQDSSLQDGTLIYKVKMRGTFNPPDGPVMQKKTMGWEASTERLY  
PRDGV LKGEIHQALKLKDGGRYLVEFKTIYMAKKPVQLPGY YVDTKLDITSHNEDYTIVEQYERSEGRH  
HLFLGHGTGSTGSGSSGTASSEDNMAVIKEFMRFKVRMEGSMNGHEFEIEGEGEGRPYEGTQTAKLKVT  
KGGPLPFAWDILSPQFMYGSKAYVKHPADIPDYKKLSFPEGFKWERVMNFEDGGLVTVTQDSSLQDGTLI  
YKVKMRGTFNPPDGPVMQKKTMGWEASTERLYPRDGV LKGEIHQALKLKDGGRYLVEFKTIYMAKKPV  
QLPGY YVDTKLDITSHNEDYTIVEQYERSEGRHHLFLYGMDELYK\*

#### DNA sequence

ATGGGTGAAAAACCCGGGACCAGGGTCTTCAAGAAGTTCGAGCCCTAACTGCAAGCTCACCGTGTACTT  
GGCAAGCGTGACTTTGTGGATCACTTGGACAAAGTGGATCCTGTTCGATGGTGTGGTGTCTTGTGGATC  
CTGACTACTTGAAGGACCGGAAAGTGTGGTGTGACCCTCACCTGTGCCTTCCGCTATGGCCGAGAAGAC  
CTGGATGTACTGGGCTGTCTTTCCGCAAAGATCTGTTCATCGCCACCTACCAGGCCTTCCCCCCCATG  
CCCAACCCACCTCGGCCCCCACC CGCCTACAGGACCGACTGCTGAAGAAGTTGGGCCAGCACGCCCA  
CCCCTTTTTTTTTACAATACCCAGAATTTGCCTTGTCCGTCACTGCAGCCAGGACCGGAGGACAC  
AGGGAAGGCCTGTGGAGTAGACTTTGAGATTCGAGCCTTCTGTGCCAAATCTATAGAAGAAAAAGCC  
ACAAAAGGAACTCCGTGCGGCTTATCATCAGAAAGGTACAGTTTGTCTCCTGAGACACCCGGCCCCCAG  
CCATCAGCTGAAACACACGCCACTTCCATGTCTGACCGGAGGTCCCTGCACCTAGAGGCTTCCCTG  
GACAAAGAGCTGTACTACCTACCTGGGGAACCCCTCAATGTCAACGTCCACGTACCAACAATTCTGCCAA  
GACCGTCAAGAAGATCAGAGTGTCTGTGAGCAGATGATGCCGACATTTGCCTCTCCAGCACCAGCGCA  
ACAAGTGTCTGTGGCTCAGCTTGAACAAGATGACCAGGTGTCTCCAGTTCCACATTCTGCAAGGTG  
TACACCATAACCCCGCTGCTCAGTGACAACCGAGAGAAGCGTGGCCTTGCCCTTGATGGGCAACTCAA  
GCACGAAGACACCAACCTGGCTTCCAGCACCATTGTGAAGGAGGGAGCCAACAAGGAGGTGCTGGGA  
ATCCTAGTATCCTACAGGGTCAAGGTGAAGCTGGTGGTGTCTCGAGGCGGGGATGTCTCCGTGGAGCT  
ACCTTCGTCTAATGCACCCCAAGCCCCACGACCACATCACCTTCCCCGACCCAGTCAGCCCCCG

GGAAATAGACATCCCTGTGGATACCAACCTCATTGAATTCGATACCAACTATGCCACAGACGACGACA  
 TCGTGTGTTGAGGACTTTGCGAGGCTTCGGCTGAAGGGGATGAAGGATGACGACTGTGATGACCAGTTC  
 TGCCTGAGCTCACTCGAAGGTGGCGGTGGCTCTGGAGGTGGTGGGTCCGGAGGAGGCGGCATCGAGA  
 TGTCCAGCATGGTGAGCGATACTAGCTGTACCTTCCCATCATCTGACGGAATCTTCTGGAAGCACTGG  
 ATTCAGACTAAGGACGGCCAGTGTGGCAGCCCACTGGTGAGCACACGAGACGGATTTCATCGTGGGGA  
 TTCACAGCGCTCCAACCTTTACAAACACCAATAACTATTTACCTCAGTGCCAAAGAACTTTATGGAGC  
 TGCTGACCAACCAGGAGGCCAGCAGTGGGTGAGCGGGTGGCGCCTGAACGCCGATTCCGTGCTGTG  
 GGGCGGGCACAAGGTGTTTATGGCATGCGGAAGCGGA**GCTACTAACTTCAGCCTGCTGAAGCAGGCT**  
**GGAGACGTGGAGGAGAACCCTGGACCT**GAATTCATGGTGAGCAAGGGCGAGGAGGTCATCAAAGAGT  
 TCATGCGCTTCAAGGTGCGCATGGAGGGCTCCATGAACGGCCACGAGTTCGAGATCGAGGGCGAGGG  
 CGAGGGCCGCCCTACGAGGGCACCCAGACCGCCAAGCTGAAGGTGACCAAGGGCGGCCCCCTGCC  
 TTCGCTGGGACATCCTGTCCCCCAGTTCATGTACGGCTCCAAGGCGTACGTGAAGCACCCCGCCGA  
 CATCCCGATTACAAGAAGCTGTCTTCCCCGAGGGCTTCAAGTGGGAGCGCGTGATGAACTTCGAGG  
 ACGGCGGTCTGGTGACCGTGACCCAGGACTCCTCCCTGCAGGACGGCACGCTGATCTACAAGGTGAAG  
 ATGCGCGGCACCAACTTCCCCCCGACGGCCCCGTAATGCAGAAGAAGACCATGGGCTGGGAGGCCT  
 CCACCGAGCGCCTGTACCCCGCGACGGCGTGCTGAAGGGCGAGATCCACCAGGCCCTGAAGCTGAA  
 GGACGGCGGCCGCTACCTGGTGGAGTTCAAGACCATCTACATGGCCAAGAAGCCCGTGCAACTGCCCG  
 GCTACTACTACGTGGACACCAAGCTGGACATCACCTCCCACAACGAGGACTACACCATCGTGGAACAG  
 TACGAGCGCTCCGAGGGCCGCCACCACCTGTTCTGGGGCATGGCACCGGCAGCACCGGCAGCGGCA  
 GTTCCGGCACCGCCTCCTCCGAGGACAACAACATGGCCGTCATCAAAGAGTTCATGCGCTTCAAGGTG  
 CGCATGGAGGGCTCCATGAACGGCCACGAGTTCGAGATCGAGGGCGAGGGCGAGGGCCGCCCTACG  
 AGGGCACCCAGACCGCCAAGCTGAAGGTGACCAAGGGCGGCCCCCTGCCCTTCGCTGGGACATCCTG  
 TCCCCCAGTTCATGTACGGCTCCAAGGCGTACGTGAAGCACCCCGCCGACATCCCCGATTACAAGAA  
 GCTGTCTTCCCCGAGGGCTTCAAGTGGGAGCGCGTGATGAACTTCGAGGACGGCGGTCTGGTGACCG  
 TGACCCAGGACTCCTCCCTGCAGGACGGCACGCTGATCTACAAGGTGAAGATGCGCGGCACCAACTTC  
 CCCCCGACGGCCCCGTAATGCAGAAGAAGACCATGGGCTGGGAGGCCTCCACCGAGCGCCTGTACC  
 CCGCGACGGCGTGCTGAAGGGCGAGATCCACCAGGCCCTGAAGCTGAAGGACGGCGGCCGCTACCT  
 GGTGGAGTTCAAGACCATCTACATGGCCAAGAAGCCCGTGCAACTGCCCGGCTACTACTACGTGGACA  
 CCAAGCTGGACATCACCTCCCACAACGAGGACTACACCATCGTGGAACAGTACGAGCGCTCCGAGGG  
 CCGCCACCACCTGTTCTGTACGGCATGGACGAGCTGTACAAGTAG

**I. CMV IE94::NPY1R-V2tail-TEV-N-BLITz-1-tTA-SV40pA**

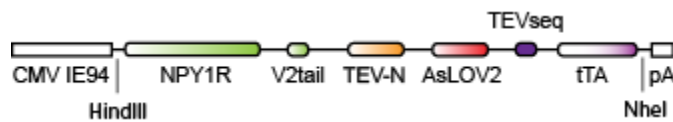

**Amino acid sequence**

MKTIIALS YIFCLV FADYKDDDDASIDMNSTLFSQVENH SVHSNFSEKNAQLLAFENDDCHLPLAMIFTLAL  
 AYGAVIILGVSGNLALIIILKQKEMRNVTNILIVNLSFSDLVAIMCLPFTFVYTLMDHWVFGTEAMCKLNPF  
 VQCVSITVSIFSLVLI AVERHQLIINPRGWRPNNRHAYVGI AIVWVLA VASSLPFLIYQVMTDEPFQNVTLDA  
 YKDKYVCFDQFPSDSHRLSYTTLLLVLYFGPLCFIFICYFKIYIRLKRNNMMDKMRDNKYRSSETKRINI  
 MLLSIVVAFAVCWLP LTI FNTVFDWNHQIATCNHNLFL LCHLTAMISTCVNPIFYGFLNKNFQRDLQFFFN  
 FCDFRSRDDDYETIAMSTMHTDVSKTSLKQASPVAFK KINNND DNEKIIDTGGRTPPSLGPQDESCTTASS  
 LAKDTS SLEMGESLFK GPRDYNPISSTICHLT NESDGHTTSLY GIGFGPFIITNKHLFRRNNGTLLVQSLHGVF  
 KVKNTTTTLQQLIDGRDMIIRMPKDFPPFPQKLKFR EPQREERICLVTTNFQELGSGSGEFLATT LERIEKNF  
 VITDPRLPDNP IIFASDSFLQLTEYSREEILGRNCRFLQGPETDRATVRKIRDAIDNQTEVTVQLIN YTKSGKK  
 FWNV FHLQPMRDYKGDVQYFIGVQLD GTERLHGA AEREAVCLIKKTA FQIAENLYFQGSRLDKSKVINS A  
 LELLNEVGIEGLTTRKLAQKLGVEQPTLYWHVKNKRALLDALAIEM LDRHHTHF CPLEGESWQDFLRNNA

KSFRCALLSHRDGAKVHLGTRPTEKQYETLENQLAFLCQQGFSLENALYALS AVGHFTLGCVLEDQEHQV  
AKEERETPTTDSMPPLLRQAIELFDHQGAEP AFLGLELIICGLEKQLKCESGSAYSRRARTKNNYGSTIEGLL  
DLPDDDAPEEAGLAAPRLSFLPAGHTRRLSTAPPTD VSLGDELHLDGEDVAMAHADALDDFDLMDLGDG  
DSPGPGFTPHDSAPYGALDMADFEFEQMFTDALGIDEYGG\*

## DNA sequence

ATGAAGACGATCATCGCCCTGAGCTACATCTTCTGCCTGGTATTCGCCGACTACAAGGACGATGATGA  
CGCCAGCATCGATATGAATTCAACACTTTTTTCTCAGGTGGAGAATCATAGTGTCCATTCCAATTTTCAG  
TGAGAAGAACGCACAGCTGCTTGCCTTGGAGAATGACGATTGTCACCTGCCACTGGCTATGATTTTCA  
CCCTCGCCCTGGCTTACGGAGCCGTCATCATACTGGGCGTTTCAGGAAACCTCGCTCTCATCATTATCA  
TTCTTAAGCAAAAAGAAATGAGGAATGTGACGAACATTTTGATAGTCAATCTGTCATTTAGCGATCTC  
CTCGTAGCAATTATGTGTCTTCCATTTACCTTTGTGTACACTCTGATGGACACTGGGTGTTTGGCGAG  
GCCATGTGCAAATTGAACCCTTTCGTGCAGTGTGTCTCCATTACGGTGTCCATATTCTCTCTCGTCTGA  
TTGCCGTGCAAAGACATCAGCTGATTATCAATCCCCGAGGGTGGCGACCTAATAACCGCCATGCTTAC  
GTGGGAATAGCGTAATCTGGGTGTTGGCGGTGGCCAGTTCCTGCCCTTCCTCATTTACCAGGTGATG  
ACAGACGAGCCTTTTCAAATGTAACCTTTGACGCTTATAAGGATAAGTATGTGTGTTTCGACCAGTTC  
CCCAGTGACTCCCACAGATTGAGTTATAACAACACTGCTGTTGGTTCTTCAGTACTTCGGCCCCCTCTGT  
TTTATCTTTATATGCTACTTCAAGATCTATATCAGACTCAAACGCAGGAATAACATGATGGACAAGAT  
GAGAGATAACAAATACCGCAGCTCAGAGACTAAGCGCATCAACATTATGCTGCTGTCCATTGTGGTTG  
CGTTCGCAGTTTGTGGCTGCCTCTTACAATCTTAACTGTGTTTCGATTGGAATCATCAGATCATCG  
CAACCTGTAACCATAACCTGTTGTTCTGCTCTGCCATTTGACAGCCATGATCAGTACATGCGTGAACC  
CGATCTTTTACGGATTTTTGAACAAGAACTTCCAGCGGGACCTGCAGTTTTTTTTCAACTTTTGGGATTT  
CCGCTCCCGGGATGACGATTACGAGACAATAGCAATGAGTACAATGCACACGGACGTTTCTAAAACG  
AGTCTGAAGCAGGCCAGCCCCGTGGCTTTCAAGAAAATAAACAACAACGACGACAATGAAAAAATTA  
TCGATAACCGGTGGACGCACCCACCCAGCCTGGGTCCCCAAGATGAGTCTGCACCACCGCCAGCTCC  
TCCCTGGCCAAGGACACTTCATCGCTCGAGATGGGCGAGAGCCTGTTCAAGGGACCTAGGGACTACAA  
CCCTATCAGTAGCACAATTTGTCACCTGACCAACGAGAGTGATGGCCACACAACAAGCCTGTACGGCA  
TCGGGTTTCGGACCCCTTATCATCACCAACAAGCACCTGTTTCAGGCGGAATAATGGCACTCTGTGGT  
CAGAGCCTGCACGGGTGTTCAAAGTGAAGAACAACAACCCTCTGCAGCAGCACCTGATCGATGGGC  
GGGATATGATCATCATTAGGATGCCAAGGACTTCCCCCTTTTCTCAGAAACTGAAGTTCCGAGAG  
CCCCAGAGAGAGGAGAGAATCTGTCTGGTGACCACAACTTTTCAGGAGCTCGGTAGTGGTAGTGGGG  
AGTTTCTGGCAACCACACTGGAACGGATCGAGAAAAATTTCTGTGATTACTGATCCGAGACTGCCTGAC  
AACCAATCATTTTTGCGAGCGATTCTTCTGCAGCTGACAGAATATTCTCGGGAAGAGATCCTGGG  
GCGCAATTGCCGTTTTCTGCAGGGACCCGAGACAGACCGTGCCACTGTTTCGAAAAATCAGAGATGCTA  
TTGACAACCAGACTGAAGTGACCGTTCAGCTGATCAATTATACCAAGAGCGGCAAGAAGTTCTGGAAC  
GTGTTCCACCTGCAGCCGATGCGCGATTATAAGGGCGACGTCCAGTACTTCATTGGCGTGCAGCTGGA  
TGGCACCGAACGTCTTCATGGCGCCGCTGAGCGTGAGGCGGTCTGCCTGATCAAAAAGACAGCCTTTC  
AGATTGCTGAGAACCTGTACTTCCAGGGCTCTAGATTAGATAAAAAGTAAAGTGATTAACAGCGCATT  
GAGCTGCTTAATGAGGTTCGGAATCGAAGTTTAAACAACCCGTAACCTCGCCAGAAGCTAGGTGTAGA  
GCAGCCTACATTGTATTGGCATGTA AAAAATAAGCGGGCTTTGCTCGACGCCTTAGCCATTGAGATGT  
TAGATAGGCACCATACTCACTTTTGCCCTT TAGAAGGGGAAAGCTGGCAAGATTTTTTACGTAATAAC  
GCTAAAAGTTTTAGATGTGCTTTACTAAGTCATCGCGATGGAGCAAAAAGTACATTTAGGTACACGGCC  
TACAGAAAAACAGTATGAAACTCTCGAAAATCAATTAGCCTTTTTATGCCAACAAGTTTTTCACTAG  
AGAATGCATTATATGCACTCAGCGCTGTGGGGCATTTTACTTTAGGTTGCGTATTGGAAGATCAAGAG  
CATCAAGTCGCTAAAGAAGAAAGGGAAACACCTACTACTGATAGTATGCCGCCATTATTACGACAAGC  
TATCGAATTATTTGATCACAAGGTGCAGAGCCAGCCTTCTTATTCGGCCTTGAATTGATCATATGCGG  
ATTAGAAAAACAACCTTAAATGTGAAAGTGGGTCCGCGTACAGCCGCGCGGTACGAAAAACAATTAC  
GGGTCTACCATCGAGGGCCTGCTCGATCTCCCGACGACGACGCCCCGAAGAGGGCGGGGCTGGCGG  
CTCCGCGCCTGTCTTTCTCCCCGCGGGACACACGCGCAGACTGTGACGGCCCCCCCCGACCGATGTC  
AGCCTGGGGGACGAGCTCCACTTAGACGGCGAGGACGTGGCGATGGCGCATGCCGACGCGCTAGACG  
ATTTGATCTGGACATGTTGGGGGACGGGGATTCCCCGGGTCCGGGATTTACCCCCACGACTCCGCC  
CCCTACGGCGCTCTGGATATGGCCGACTTCGAGTTTGAGCAGATGTTTACCGATGCCCTTGAATTGAC  
GAGTACGGTGGGTAG

## J. CMV IE94::CB1R-V2tail-TEV-N-BLITz-1-tTA-SV40pA

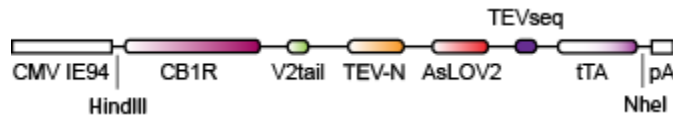

### Amino acid sequence

MKTIIALS YIFCLVFADYKDDDDASIDMKSILDGLADTTFRITITDILLYVGSNDIQYEDIKGD MASKLGYFPQ  
KFPLTSFRGSPFQEKMTAGDNPQLVPADQVNITEFYNKSLSSFKENEENIQCGENFMDIECFMVLNPSQQLA  
IAVLSLTLGTFTVLENLLVLCVILHSRSLRCRPSYHFIGSLAVADLLGSVIFVYSFIDFHV FHRKDSRNVFLFK  
LGGVTASFTASVGSFLTAIDRYISHRPLAYYKRIVTRPKAVVAFCMLW TIAIVIAVLP LLGW NCEKLQSVCS  
DIFPHIDET YLMFWIGVTSVLLL FIVYAYMYILWKAHSHAVRMIQRGTQKSIIIHTSEDGKVQVTRPDQARM  
DIRLAKTLVLILVVLII CWGPLLAIMVYDVFGKMNKLIKTVFAFCMLCLLNSTVNP IYALRSKDLRHAFRS  
MFPSCEGTAQPLDNSMGDS DCLHKHANNAASVHRAAESCIKSTVKIAKVTMSVSTDTSAEALIDTGGRTPP  
SLGPQDESC TASSSLAKDTSSLEMGESLFK GPRDYNPISSTICHLTNESDGHTTSLY GIGFGPFIITNKHLFRR  
NNGTLLVQSLHGVFKVKN TTTLQQHLIDGRDMIIRMPKDFPPFPQKLFREPQREERICLVTTNFQELGSGS  
GEFLATTLERIEKNFVITDPRLPDNPIIFASDSFLQLTEYSREEILGRNCRFLQGPETDRATVRKIRDAIDNQTE  
VTVQLIN YTKSGKKFWNVFHLQPMRDYKGDVQYFIGVQLD GTERLHGA AEREAVCLIKKTA FQIAENLYF  
QGSRLDKSKVINSALELLNEVGIEGLTTRKLAQKLGVEQPTLYWHVKNKRALLDALAIEM LDRHHTHFCPL  
EGESWQDFLRNNAKSFRCALLSHRDGAKVHLGTRPTEKQYETLENQLAFLCQQGFSLENALYALSAVGHF  
TLGCVLEDQEHQVAKEERETPTTDSMPLLRQAIELFDHQGAEPFLGLELIICGLEKQLKCESGSAYSRA  
RTKNNYGSTIEGLLDLPDDAPEEAGLAAPRLSFLPAGHTRRLSTAPPTDVS LGDELHLDGEDVAMAHADA  
LDDFDLMDLGDGDSPPGPGFTPHDSAPYGALDMADFEFEQMFTDALGIDEYGG\*

### DNA sequence

ATGAAGACGATCATCGCCCTGAGCTACATCTTCTGCCTGGTATTCGCCGACTACAAGGACGATGATGA  
CGCCAGCATCGATATGAAGAGCATT TTTGGATGGGCTCGTGATACCACATTCGGACAATTACA ACTG  
ATCTGCTGTACGTGGGTTCAAACGATATTCAGTATGAGGACATAAAAGGCGATATGGCCTCTAACTG  
GGCTATTTCCACAGAAGTTCCTCTCACCAGCTTCCGCGGTAGCCCTTTTCAGGAGAAAATGACTGCG  
GGAGACAATCCTCAGCTCGTCCCCGCAGACCAGGTGAACATTACTGAATTTTACAACAAGAGTTTGAG  
CAGCTTAAAGGAGAACGAGGAGAACATACAGTGCGGAGAAACTTTATGGACATTGAGTGCTTTATG  
GTGCTGAATCCAGTCAGCAGCTGGCTATAGCGGTGCTGTCCTGACCCTGGGACTTTCACGGTCTTG  
GAGAATCTGCTGGTGTGTCGTCATCTTGACAGCCGGTCACTGCGGTGTCGGCCAAGTTATCACTTT  
ATTGGCTCACTCGCTGTCGCTGATCTCCTGGGCTCCGTGATTTTCGTTTATTCATTCATCGACTTCCATG  
TCTTCCACCGGAAAGACTCACGGAACGTTTTTCTTTTCAAGCTTGGAGGCGTTACGGCCAGTTTTACTG  
CTAGCGTAGGAAGCCTGTTCTGACTGCGATCGACCGATACATCAGCATCCATAGACCACTCGCTTAT  
AAGCGGATTGTAACACGCCAAAGGCCGTGGTGCCTTTTGCTTGATGTGGACGATTGCCATCGTCAT  
CGCCGTGCTGCCACTGCTCGGGTGGAACTGCGAAAAGTTGCAGTCCGTGTGCAGTGACATCTTCCCCC  
ATATCGACGAGACCTACCTCATGTTCTGGATTGGCGTAACAAGCGTTCTGTTGCTGTTTATTGTCTACG  
CTTACATGTACATTCTGTGGAAGGCCATAGTCACGCGGTCCGATGATCCAGCGCGGTACCCAGAAG  
TCAATAATTATTCACACATCTGAAGACGGCAAAGTACAGGTCAACAAGACCGGACCGGCTCGGATGG  
ACATCAGGCTTGCTAAGACACTGGTGTGTGATACTGGTGGTGCTGATTATCTGCTGGGGACCTCTCCTCG  
CTATTATGGTGTACGACGTGTTCCGCAAGATGAATAAGTTGATCAAGACCGTATTTCCTTCTGTTCTA  
TGCTGTGCCTGCTAATAGTACTGTGAACCCCATCATCTACGCCCTGCGCTCTAAAGACTTGCGCCACG  
CCTTCCGGTCCATGTTTCCCTCCTGTGAGGGTACCGCACAGCCCTCGACA ACTCCATGGGGGATAGCG  
ATTGCCTTACAAGCATGCAAACAACGCAGCATCCGTCCACAGGGCGGCCGAGAGTTGCATCAAGTCT

ACCGTAAAATCGCTAAAGTTACTATGTCAGTCAGCACTGACACATCTGCCGAAGCTCTGATCGATAC  
 CGGTGGACGCACCCACCCAGCCTGGGTCCCCAAGATGAGTCCTGCACCACCGCCAGCTCCTCCCTGG  
 CCAAGGACACTTCATCGCTCGAGATGGGGCGAGAGCCTGTTCAAGGGACCTAGGGACTACAACCCTATC  
 AGTAGCACAATTTGTCACCTGACCAACGAGAGTGATGGCCACACAACAAGCCTGTACGGCATCGGGTT  
 CGGACCCTTTATCATCACCAACAAGCACCTGTTTCAGGCGGAATAATGGCACTCTGCTGGTGCAGAGCC  
 TGCACGGGGTGTTCAAAGTGAAGAACACAACCACTCTGCAGCAGCACCTGATCGATGGGCGGGATAT  
 GATCATCATTAGGATGCCCAAGGACTTCCCCCTTTTCCCTCAGAACTGAAGTTCCGAGAGCCCCAGA  
 GAGAGGAGAGAATCTGTCTGGTGACCACAACTTTTCAGGAGCTCGGTAGTGGTGTAGTGGGGAGTTTCTG  
 GCAACCACACTGGAACGGATCGAGAAAAATTTTCGTGATTACTGATCCGAGACTGCCTGACAACCCAAT  
 CATTTTTGCGAGCGATTCTTCTGCAGCTGACAGAATATTCTCGGGAAGAGATCCTGGGGCGCAATT  
 GCCGTTTTCTGCAGGGACCCGAGACAGACCGTGCCACTGTTCCGAAAATCAGAGATGCTATTGACAAC  
 CAGACTGAAGTGACCGTTCAGCTGATCAATTATACCAAGAGCGGCAAGAAGTTCTGGAACGTGTTCCA  
 CCTGCAGCCGATGCGCGATTATAAGGGCGACGTCCAGTACTTCATTGGCGTGCAGCTGGATGGCACCG  
 AACGTCTTCATGGCGCGCTGAGCGTGAGGCGGTCTGCCTGATCAAAAAGACAGCCTTTCAGATTGCT  
 GAGAACCTGTACTTCCAGGGCTCTAGATTAGATAAAAAGTAAAGTGATTAACAGCGCATTAGAGCTGCT  
 TAATGAGGTTCGGAATCGAAGGTTTAAACAACCCGTAACCTCGCCAGAAGCTAGGTGTAGAGCAGCCT  
 ACATTGTATTGGCATGTAAAAATAAGCGGGCTTTGCTCGACGCCTTAGCCATTGAGATGTTAGATAG  
 GCACCATACTCACTTTTGCCCTTGTAGAAGGGGAAAGCTGGCAAGATTTTTTACGTAATAACGCTAAAA  
 GTTTTAGATGTGCTTTACTAAGTCATCGCGATGGAGCAAAAAGTACATTTAGGTACACGGCCTACAGAA  
 AAACAGTATGAACTCTCGAAAAATCAATTAGCCTTTTTATGCCAACAAGTTTTTCACTAGAGAATGC  
 ATTATATGCACTCAGCGCTGTGGGGCATTTTACTTTAGGTTGCGTATTGGAAGATCAAGAGCATCAAGT  
 CGCTAAAGAAGAAAGGAAACACCTACTACTGATAGTATGCCGCCATTATTACGACAAGCTATCGAAT  
 TATTTGATCACAAGGTGCAGAGCCAGCCTTCTTATTCGGCCTTGAATTGATCATATGCGGATTAGAAA  
 AACAACCTAAATGTGAAAGTGGGTCCGCGTACAGCCGCGCGGTACGAAAAACAATTACGGGTCTAC  
 CATCGAGGGCCTGCTCGATCTCCCGGACGACGACGCCCCGAAGAGGCGGGGCTGGCGGCTCCGCGC  
 CTGTCCTTTCTCCCGCGGGACACACGCGCAGACTGTCGACGCCCCCCCCGACCGATGTCAGCCTGGG  
 GGACGAGCTCCACTTAGACGGCGAGGACGTGGCGATGGCGCATGCCGACGCGCTAGACGATTCGAT  
 CTGGACATGTTGGGGGACGGGGATTCCCCGGGTCCGGGATTTACCCCCACGACTCCGCCCCCTACGG  
 CGCTCTGGATATGGCCGACTTCGAGTTGAGCAGATGTTTACCGATGCCCTTGAATTGACGAGTACG  
 GTGGGTAG

**K. CMV IE94::HTR1A-V2tail-TEV-N-BLITz-1-tTA-SV40pA**

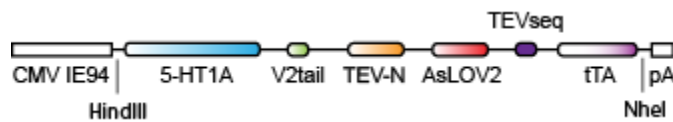

**Amino acid sequence**

MKTIIALSYIFCLVFADYKDDDDASIDMDVLSPGQGNNTTSPAPFETGGNTTGISDVTVSYQVITSLLLGLTI  
 FCAVLGNACVVAIALERSLQNVANYLIGSLAVTDLMSVVLVLPMAALYQVLNKWTLGQVTCDLFIALD  
 VLCCTSSILHLCAIALDRYWAITDPIDYVNRKTPRRAAALISLTWLIGFLISIPMLGWRTPEDRSDPDACTIS  
 KDHGYTIYSTFGAFYIPLLLMLVLYGRIFRAARFRIRKTVKKVEKTGADTRHGASPAPQPKKSVNGESGRN  
 WRLGVESKAGGALCANGAVRQDDGAALVIEVHRVGNKEHLPLPSEAGPTPCAPASFERKNERNAEAK  
 RKMALARERKTVKTLGIMGTFILCWLPFFIVALVLPFCESSCHMPTLLGAINWLGYSNSSLNPVIYAYFNK  
 DFQNAFKKIKCKFCRQIDTGGRTPPSLGPQDESCTTASSSLAKDTSSLEMGESLFGKPRDYNPISSTICHLTN  
 ESDGHTTSLYIGFGPFIITNKHLFRRNNGTLLVQSLHGVFKVKNTTTLQQHLIDGRDMIIRMPKDFPPFPQ  
 KLFREPPQREERICLVTTNFQELGSGSGEFLATTLERIEKNFVITDPRLPDNPIIFASDSFLQLTEYSREEILGR  
 NCRFLQGPETDRATVRKIRDAIDNQTEVTVQLINYTKSGKKFWNVFHLQPMRDYKGDVQYFIGVQLDGTG  
 RLHGAAEREAVCLIKKTAFAQIAENLYFQGSRLDKSKVINSALLELLNEVGIEGLTRKLAQKLGVEQPTLYW

HVKNKRALLDALAIEMLDHRHHTHFCPLEGESWQDFLRNNAKSFRCALLSHRDGAKVHLGTRPTEKQYETL  
ENQLAFLCQQGFSLENALYALSAVGHFTLGCVLEDQEHQVAKEERETPTTDSMPPLLRQAIELFDHQGAEP  
AFLFGLLELIICGLEKQLKCESGSAYSRRARTKNNYGSTIEGLLDLPDDDAPEEAGLAAPRLSFLPAGHTRRLST  
APPTDVS LGDELHLDGEDVAMAHADALDDFDLMDLGDGDSPPGFTPHDSAPYGALDMADFEFEQMFTD  
ALGIDEYGG\*

## DNA sequence

ATGAAGACGATCATCGCCCTGAGCTACATCTTCTGCCTGGTATTCGCCGACTACAAGGACGATGATGA  
CGCCAGCATCGATATGGACGTGCTGAGTCCCGGCCAGGGCAACAACACCACTTCTCCACCGGCTCCGT  
TCGAAACTGGCGGTAATAACAACCGGCATCTCTGATGTTACCGTCAGTTATCAAGTGATCACTAGCCTG  
CTGCTTGGTACTCTGATCTTCTGTGCCGATTGGGAAACGCATGTGTGGTAGCAGCCATTGCCCTGGAG  
CGCAGCCTTCAGAATGTGGCAAACCTATTTGATTGGCTCACTGGCAGTGACGGACCTCATGGTGAGCGT  
GCTCGTCTTCCAATGGCAGCTCTCTATCAGGTTCTCAATAAGTGGACCCTGGGCCAAGTGACCTGTGA  
CCTGTTTATCGCACTCGACGTGCTTTGTTGCACCTCTCCATTTTGCATCTGTGTGCCATAGCATTGGAT  
AGGTACTGGGCTATCACAGATCCGATCGACTACGTGAACAAGAGGACACCTCGGCGGGCTGCCGCTCT  
GATCAGCTTGACGTGGCTGATTGGCTTTTTGATTAGTATACCTCCCATGCTTGGGTGGAGGACACCTGA  
GGATAGAAGCGACCTGACCGGTGACCATTTCAAAGGATCACGGCTACACCATCTACTCCACCTTCG  
GAGCATTCTATATAACCACTGTTGTTGATGTTGGTGTGATGGACGGATATTCGCGCGCCGCGCGGTTCA  
GGATCCGGAAGACTGTAAAGAAAGTGGAAAAGACTGGGGCGGATACCCGGCATGGTGCCCTCCCCCGC  
TCCACAGCCCAAGAAGTCCGTGAACGGGGAGAGTGGGAGCAGGAACCTGGAGATTGGGAGTGGAATCT  
AAGGCCGGAGGGGCACTGTGTGCCAACGGTGCAGTAAGACAAGGAGACGCGGTGCTGCACTTGAAG  
TAATCGAGGTGCATAGAGTGGGAATAGTAAAGAACACCTGCCTCTCCCCTCCGAGGCCGGACCAACT  
CCATGCGCCCCGGCCTCTTTTGGAGCGGAAAACGAGAGAAATGCTGAGGCAAAGCGGAAGATGGCCC  
TTGCCCGGGAACGGAAAACAGTAAAACCCCTGGGGATTATCATGGGGACATTCATCCTGTGTTGGCTG  
CCCTTTTTCATCGTGGCACTCGTGCTGCCATTTTGCATCATCATATGCCACGCTTCTCGGGG  
CCATCATAATTGGCTGGGTTACAGCAATAGCCTGCTGAATCCCGTCATCTACGCTTACTTCAACAAGG  
ATTTCCAGAATGCCTTTAAAAAGATAATTAAGTGAAGTTCTGTAGACAAATCGATACCCGGTGGAGC  
ACCCACCCAGCCTGGGTCCCAAGATGAGTCTGACCACCCAGCTCCTCCTCGCCAAGGACAC  
TTCATCGCTCGAGATGGGCGAGAGCCTGTTCAAGGGACCTAGGGACTACAACCCTATCAGTAGCACAA  
TTTGTACCTGACCAACGAGAGTGATGGCCACACAACAAGCCTGTACGGCATCGGGTTCGGACCCTTT  
ATCATCACCAACAAGCACCTGTTCAAGCGGAATAATGGCACTCTGCTGGTGCAGAGCCTGCACGGGGT  
GTTCAAAGTGAAGAACAACAACCACTCTGCAGCAGCACCTGATCGATGGGCGGGATATGATCATCATA  
GGATGCCCAAGGACTTCCCCCTTTTCCCTCAGAACTGAAGTTCCGAGAGCCCCAGAGAGAGGAGAGA  
ATCTGTCTGGTGACCACAACTTTTCAAGGAGCTCGGTAGTGGTAGTGGGGAGTTTCTGGCAACCACCT  
GGAACGGATCGAGAAAAATTTCTGTGATTACTGATCCGAGACTGCCTGACAACCAATCATTTTTTGCGA  
GCGATTCTTCTGACGCTGACAGAATATTCTCGGGAAGAGATCCTGGGGCGCAATTGCCGTTTTCTGC  
AGGGACCCGAGACAGACCGTGCCTGTTTCGAAAATCAGAGATGCTATTGACAACCAGACTGAAGT  
GACCGTTCAGCTGATCAATTATACCAAGAGCGGCAAGAAGTTCTGGAACGTGTTCCACCTGCAGCCGA  
TGCGGATTATAAGGGCGACGTCCAGTACTTCATTGGCGTGCAGCTGGATGGCACCGAACGTCTTCAT  
GGCGCCGCTGAGCGTGAGGCGGTCTGCCTGATCAAAAAGACAGCCTTTCAGATTGCTGAGAACCTGTA  
CTTCCAGGGCTCTAGATTAGATAAAAGTAAAGTGATTAACAGCGCATTAGAGCTGCTTAATGAGGTCCG  
GAATCGAAGGTTTAAACAACCCGTAAACTCGCCAGAAGCTAGGTGTAGAGCAGCCTACATTGTATTGG  
CATGTAATAAATAAGCGGGCTTTGCTCGACGCCTTAGCCATTGAGATGTTAGATAGGCACCATACTCA  
CTTTTGGCCTTTAGAAGGGGAAAGCTGGCAAGATTTTTTACGTAATAACGCTAAAAGTTTTAGATGTGC  
TTTACTAAGTCATCGCGATGGAGCAAAAAGTACATTTAGGTACACGGCCTACAGAAAAACAGTATGAAA  
CTCTCGAAAATCAATTAGCCTTTTTATGCCAACAAGGTTTTTACTAGAGAATGCATTATATGCACTCA  
GCGCTGTGGGGCATTTTACTTTAGGTTGCGTATTGGAAGATCAAGAGCATCAAGTCGCTAAAGAAGAA  
AGGGAAACACCTACTACTGATAGTATGCCGCCATTATTACGACAAGCTATCGAATTATTTGATCACCA  
AGGTGCAGAGCCAGCCTTCTTATTTCGGCCTTGAATTGATCATATGCGGATTAGAAAAACAACCTAAAT  
GTGAAAGTGGGTCCGCGTACAGCCGCGCGGTACGAAAAACAATTACGGGTCTACCATCGAGGGCCT  
GCTCGATCTCCCGACGACGACGCCCCCGAAGAGCGGGGCTGGCGGCTCCGCGCTGTCCTTTCTCC  
CCGCGGACACACGCGCAGACTGTCGACGGCCCCCGACCCGATGTCAGCCTGGGGGACGAGCTCCA  
CTTAGACGGCGAGGACGTGGCGATGGCGCATGCCGACGCGCTAGACGATTCGATCTGGACATGTTGG





CCCAGCCCATGGTCTTCTTCTGCATTACGGGGCCGTCGGGGGGGAAGTTGGTGCCGCGCATCTTCACCT  
TGTAGATCAGCGTGCCGTCCTGCAGGGAGGAGTCCTGGGTACGGTCACCAGACCGCCGTCCTCGAAG  
TTCATCACGCGCTCCACTTGAAGCCCTCGGGGAAGGACAGCTTCTTGTAAATCGGGGATGTCGGCGGG  
GTGCTTACGTACGCCTTGGAGCCGTACATGAACTGGGGGGACAGGATGTCCCAGGCGAAGGGCAGG  
GGGCCGCCCTTGGTCACCTTCAGCTTGGCGGTCTGGGTGCCCTCGTAGGGGCGGCCCTCGCCCTCGCCC  
TCGATCTCGAACTCGTGGCCGTTTCATGGAGCCCTCCATGCGCACCTTGAAGCGCATGAACTCTTTGATG  
ACGGCCATGTTGTTGTCCTCGGAGGAGGCGGTGCCGGAAGTGGCCGTCGCCGGTGTGTCGCCGGTGCCATG  
CCCCAGGAACAGGTGGTGGCGGCCCTCGGAGCGCTCGTACTGTTCCACGATGGTGTAGTCTCGTTGT  
GGGAGGTGATGTCCAGCTTGGTGTCCACGTAGTAGTAGCCGGGACAGTTGCACGGGGCTTCTTGGCCATG  
TAGATGGTCTTGAAGTCCACCAGGTAGCGGCCCGCTCCTTCAGCTTACAGGGCCTGGTGGATCTCGCCC  
TTCAGCACGCCGTCGCGGGGGTACAGGCGCTCGGTGGAGGCCTCCCAGCCCATGGTCTTCTTCTGCATT  
ACGGGGCCGTCGGGGGGGAAGTTGGTGGCGCGCATCTTCACCTTGTAGATCAGCGTGCCGTCCTGCAG  
GGAGGAGTCTGGGTACGGTACCAGACCGCCGTCCTCGAAGTTCATCACGCGTCCCACTTGAAGC  
CCTCGGGGAAGGACAGCTTCTTGTAAATCGGGGATGTCGGCGGGGTGCTTACGTACGCCTTGGAGCCG  
TACATGAACTGGGGGACAGGATGTCCCAGGCGAAGGGCAGGGGGCCGCCCTTGGTACCTTCCAGCTT  
GGCGGTCTGGGTGCCCTCGTAGGGGCGGCCCTCGCCCTCGCCCTCGATCTCGAACTCGTGGCCGTTTCAT  
GGAGCCCTCCATGCGCACCTTGAAGCGCATGAACTCTTTGATGACCTCCTCGCCCTTGTCCACCATGAA  
TTCAGGTCCAGGGTTCTCCTCCACGTCTCCAGCCTGCTTACAGCAGGCTGAAGTTAGTAGCTCCGCTTCC  
GCATGCCATAAACACCTTGTGCCCGCCCCACAGCACGGAATCGGGGTTACAGGCGCCACCCGCTCACCC  
ACTGCTGGGCTCCTGGTTGGTACAGCAGCTCCATAAAGTTCTTTGGCACTGAGGTGAAATAGTTATTGG  
TGTTTGTAAAGTTGGAGGCGCTGTGAATCCCCACGATGAATCCGTCTCGTGTGCTCACCAAGTGGGCTGC  
CACACTGGCCGTCCTTAGTCTGAATCCAGTGCTTCCAGAAGATTCCGTGATGATGGGAAGGTACAG  
CTAGTATCGCTCACCATGCTGGACATCTCGATGCCGCTCCTCCGGACCCACCACCTCCAGAGCCACCG  
CCACCTTCGAGTGAGCTCAGGCAGAACTGGTCATCACAGTCGTCATCCTTCATCCCTTCAGCCGAAGC  
CTCGCAAAGTCTCAAACACGATGTCGTCGTCTGTGGCATAAGTTGGTATCGAATCAATGAGGTTGGT  
ATCCACAGGGATGTCTATTTCCGGGGGGCTGACTGGGGTCGGGGAAGGGTGTGTTGGTCTGGGGCT  
TGGGGTGCATTAGGACGAAAGGTAGCTCCACGGAGACATCCCCGCCTCGAGACACCACAGCTTACC  
TTGACCCTGTAGGATACTAGGATTCCCAGCACCTCCTTGTGGCTCCCTCCTTCAATGGTGCTGGAA  
GCCAGGTTGGTGTCTTCGTGCTTGTAGTTGCCATCAAGGGCAAGGCCACGCTTCTCTCGGTTGTCACTG  
AGCAGCGGGGTTATGGTGTACACCTTGCAGAATGTGGAAGTGGGAGACACCTGGTTCATCTTGTTCAG  
CTGAGCCACAGGACACTTGTACTGCGCGGTGCTGAAGAGGCAAAATGTCGGCATACTGTCTCACAGACA  
CTCTGATCTTCTTACGGTCTTGGCAGAATTGTTGGTGACGTGGACGTTGACATTGAGGGGTTCCCCAT  
GGTAGTACAGCTCTTTGTCCAGGGAAGCCTTAGGTGCAGGGACCTCCGGTCAGACATGAGGAAGTGG  
CGTGTGGTTTACGCTGATGGCTGGGGGCCGGGTGCTCAGGAGCAAATGTACCTTTCTGATGATAAG  
CCGCACGGAGTTCCCTTTTGTGGCTTTTTTCTTCTATAGATTTGGCACAGAAGGCTCGAATCTCAAAGTC  
TACTCCACAGGCCCTCCCTGTGTCCTCCGGTCTGGCTGCAGTGTGACGGAGCAAAGGCAAATTCTGGG  
GTATTGTGAAAAAAGGGGTGGGCGTGTGGCCAACTTCTTACGACGTCGGTCTGTAGGCGGGT  
GGGGGCCGAGGTGGGTTGGGCATGGGGGGGAAGGCCTGGTAGGTGGCGATGAACAGATCTTTGCCGA  
AAGACAGGCCAGTACATCCAGGTCTTCTCGCCATAGCGGAAGGCACAGGTGAGGGTCACAAACAC  
TTCCGGTCTTCAAGTAGTCAGGATCCACAAGCACACCATCGACAGGATCCACTTTGTCCAAGT  
GATCCACAAAGTACGCTTGCCCAAGTACACGGTGAGCTTGCAGTTAGGGCTCGACTTCTTGAAGACC  
CTGGTCCCGGGTTTTTACCCATAAGCTTGGTGGCGGCGGCCTAGGTACCTAGTATAACTTCGTATA  
GGATACTTTATACGAAGTTATCATTGGGATTCTTCTATTTTGTATCCAAGCATCACCATCGACCTCTA  
GTCCAGATCTCACCATCGACCCATAAAGTCTGACTGTGCCTTCTAGTTGCCAGCCATCTGTTGTTTGGCCCTCC  
CCCGTGCCTTCCCTGACCCTGGAAGGTGCCACTCCCACTGTCCTTTCTAATAAAAATGAGGAAATTGCA  
TCGCATTGTCTGAGTAGGTGTCATTCTATTCTGGGGGTGGGGTGGGGCAGGACAGCAAGGGGGAGG  
ATTGGAAGACAATAGCAGGCATGCTGGGGA

**P. pAAV TRE::Flox-eNpHR-EYFP-WPRE-bGHpA (6327 bp)**

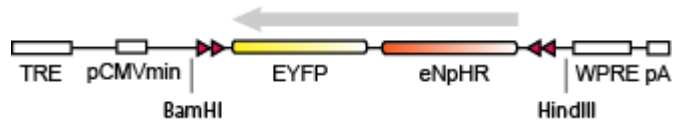

### Amino acid sequence

MRGTPLLLVVSFLSLLQDTETLPPVTESAVALQAEVTQRELFEFVLNDPLLASSLYINIALAGLSILLFVFMTRGLDDPRAKLIIVSTILVPVVSIASTGLASGLTISVLEMPAGHFAEGSSVMLGGEEVDGVVTMWGRYLTWALSTPMILLALGLLAGSNATKLFATAITFDIAMCVTGLAAAALTTSSHLMRWFWYAISCACFLVVLVYILLVEWAQDAKAAGTADMFNLTLLKLLTVVMWLGYPVWALGVEGIAVLPVGVTSWGYSFLDIVAKYIFAFLLLNYLTSNESVVSIGSILDVPSASGTPADDAAA VSKGEELFTGVVPILVELDGDVNGHKFSVSGEGEGDATYGKLTLCFICTTGKLPVPWPTLVTTFGYGLQCFARYPDHMKQHDFKFSAMPEGYVQERTIFFKDDGNYKTRAEVKFEGDTLVNRIELKGIDFKEDGNILGHKLEYNYNSHNVYIMADKQKNGIKVNFKIRHNIEDGSVQLADHYQQNTPIGDGPVLLPDNHLYSYQSALS KDPNEKRDHMLLEFVTAAGITLGMDELYKFCYENEV\*

### DNA sequence

- tetracycline response element (TRE)
- minimal CMV promoter (pCMVmin)
- LoxP sequence
- woodchuck hepatitis virus posttranscriptional regulatory element (WPRE)
- bGH polyA signal

TCCCTATCAGTGATAGAGAAAAGTGAAAGTCGAGTTTACCACTCCCTATCAGTGATAGAGAAAAGTGA  
 AAGTCGAGTTTACCACTCCCTATCAGTGATAGAGAAAAGTGAAAGTCGAGTTTACCACTCCCTATCAG  
 TGATAGAGAAAAGTGAAAGTCGAGTTTACCACTCCCTATCAGTGATAGAGAAAAGTGAAAGTCGAGT  
 TTACCACTCCCTATCAGTGATAGAGAAAAGTGAAAGTCGAGTTTACCACTCCCTATCAGTGATAGAGA  
 AAAGTGAAAGTCGAGCTCGGTACCCGGGTCGAGTAGGCGTGTACGGTGGGAGGCCTATATAAGCAGA  
 GCTCGTTTGTGAAACCGTCAGATCGCCTGGAGACGCCATCCACGCTGTTTTGACCTCCATAGAAGACA  
 CCGGACCGGATCCAGCCTCCGCGGCCCGAATTCGAGCTCGGTACCCGGGGATCCTCTAGAGTCGACT  
 CCGGAATAACTTCGTATAGGATACTTTATACGAAGTTATGCAGAAATGGTAGCTGGATTGTAGCTGCTA  
 TTAGCAATATGAAACCTCTTAATAACTTCGTATAGCATAACATTATACGAAGTTATGGCGCGCCTCATT  
 CACTCGTTCTCGTAGCAGAACTTGTACAGCTCGTCCATGCCGAGAGTGATCCCGGGCGGCGGTCACGA  
 ACTCCAGCAGGACCATGTGATCGCGCTTCTCGTTGGGGTCTTTGCTCAGGGCGGACTGGTAGCTCAGG  
 TAGTGGTTGTGCGGCAGCAGCACGGGGCCGTCGCCGATGGGGGTGTTCTGCTGGTAGTGGTCGGCGAG  
 CTGCACGCTGCCGTCTCGATGTTGTGGCGGATCTTGAAGTTCACCTTGATGCCGTTCTTCTGCTTGTGC  
 GCCATGATATAGACGTTGTGGCTGTTGTAGTTGTACTCCAGCTTGTGCCCCAGGATGTTGCCGTCTCC  
 TTGAAGTCGATGCCCTCAGCTCGATGCGGTTACCAGGGTGTGCCCTCGAACTTCACCTCGGCGCGG  
 GTCTTGTAGTTGCCCTCGTCTTGAAGAAGATGGTGCCTCCTGGACGTAGCCTTCGGGCATGGCGGA  
 CTTGAAGAAGTCGTGCTTTCATGTGGTGGGAGTACGGGGCAAGCACTGCAGGCCGATGCCGAAG  
 GTGGTCACGAGGGTGGGCCAGGGCACGGGCAGCTTGCCGGTGGTGCAGATGAACTTCAGGGTCACTG  
 TGCCGTAGGTGGCATCGCCCTCGCCCTCGCCGGACACGCTGAACTTGTGGCCGTTTACGTCGCCGTTCA  
 GCTCGACCAGGATGGGCACACCCCGGTGAACAGCTCCTCGCCCTTGCTCACGGCGGCCGCATCATCA  
 GCCGGGGTCCCAGAAGCAGATGGAACATCCAAAATGCTGCCGGACACGACAGATTGTTTTGACGTCA  
 GATAGTTACAGGAGCAAGAATGCGAAAATGTACTTTGCCACGATATCCAGGAAAGAATATCCCCAGCTC  
 GTCACCCCAACGGGCAACACCGCGATACCTCGACTCCAAGAGCCACACAATTGGATACCCAGCCA  
 CATCACTACTGTCAACAGCTTCAGGGTATTGAACATGTCAGCGGTTCCCGCGGCTTTGGCGTCTGTGC  
 CCACTCCACCAGCAGGATATAAAGACCACCAGAAAGCATGCACAATGATAGCGTACCAGAACCAT  
 CTCATGAGGTGGGAGGAGGTAGTCAGGGCCGCGGCAAGGCCAGTCACGCACATAGCGATATCGAAAG

TGATAGCTGTGAAGAGCTTTGTAGCATTGCTTCCGGCCAGGAGACCCAGAGCGAGGAGAATCATGGGC  
GTGGAAAGTGCCAGGTGAGATACCGTCCCCACATGGTGACTACACCATCTACCTCTTCTCCTCCCAGC  
ATCACTGAGCTGCCTTCTGCAAAATGGCCCCGTGGCATTTCAGAACGGAAATTGTCAGGCCGCTCGC  
CAATCCAGTGTAGGAGGCAATGCTGACGACAGGCACAAGGATGGTTGACACAGCAATAAGTTTTGCC  
CGTGGATCATCGAGTCTCGGGTCATAAAAACGAACAGCAGTATACTCAGTCTGCAAGTGCGATGTT  
GATATAGAGACTGCTTGAAGCAAAGGGTCGTTACGACGAACTCGAACAACCTCCCTTTGGGTAACCT  
CGGCTTGAAGGGCCACGGCACTCTCGGTACGGGAGGCAGGGTCTCTGTGTCTGAAGCAGAGAGAA  
CAGAGAGACGACGAGGAGCAGGGGCGTACCCCTCATGGTGCGCTAGCATAACTTCGTATAAAGTAT  
CCTATACGAAGTTATTTGCCTTAACCCAGAAATTATCACTGTTATTCTTTAGAATGGTGCAAAGATAA  
CTTCGTATAATGTATGCTATACGAAGTTATGAATTCGATATCAAGCTTATCGATAATCAACCTCTGGAT  
TACAAAATTTGTGAAAGATTGACTGGTATTCTTAACTATGTTGCTCCTTTTACGCTATGTGGATACGCT  
GCTTTAATGCCTTTGTATCATGCTATTGCTTCCCGTATGGCTTTCATTTCTCCTCCTTGATAAATCCTG  
GTTGCTGTCTCTTATGAGGAGTTGTGGCCCGTTGTCAGGCAACGTGGCGTGGTGTGCACTGTGTTTGC  
TGACGCAACCCCACTGGTTGGGGCATTGCCACCACCTGTCAGCTCCTTCCGGGACTTTCGCTTTCCC  
CCTCCCTATTGCCACGGCGGAACATCGCCCGCTGCCTTGCCCGCTGCTGGACAGGGGCTCGGCTGTT  
GGCACTGACAATTCCGTGGTGTGTCGGGGAAATCATCGTCCTTTCCTTGGCTGCTCGCCTATGTTGC  
CACCTGGATTCTGCGCGGGACGTCTTCTGCTACGTCCCTTCGGCCCTCAATCCAGCGGACCTTCCTTC  
CCGCGCCTGCTGCCGGCTCTGCGGCCCTTCCGCGTCTTCGCCTTCGCCCTCAGACGAGTCGGATCTC  
CCTTTGGGCCGCTCCCCGCATCGATACCGAGCGCTGCTCGAGAGATCGATCTGCCTCGACTGTGCCTT  
CTAGTTGCCAGCCATCTGTTGTTTGGCCCTCCCCCGTGCCTTCCCTTGACCCTGGAAGGTGCCACTCCCA  
CTGTCCTTTCCTAATAAAAATGAGGAAATTGCATCGCATTGTCTGAGTAGGTGTCATTCTATTCTGGGGG  
GTGGGGTGGGGCAGGACAGCAAGGGGGAGGATTGGGAAGACAATAGCAGGCATGCTGGGGA

| Primer Name                                                                         | Primer Sequence (5'-3')                                                                                                                                                                                                    | Application                                                                          |
|-------------------------------------------------------------------------------------|----------------------------------------------------------------------------------------------------------------------------------------------------------------------------------------------------------------------------|--------------------------------------------------------------------------------------|
| XhoI-CIBN-FW<br>CIBN-SphI-RV                                                        | ATTCTCGAGGGTGAATGAATGGAGCTATAGGAGGTG<br>TTTGCATGCATGAATATAATCCGTTTTCTC                                                                                                                                                     | to introduce CIBN domain by PCR amplification                                        |
| XbaI-tTA-FW<br>tTA-NheI-RV                                                          | ATGTCTAGATTAGATAAAAAGTAAAGTGATTAACAGC<br>TTTGCTAGCCTACCCACCGTACTCGTCAATTCCAAG                                                                                                                                              | to introduce tTA domain by PCR amplification                                         |
| SacI-AsLOV2 FW<br>BLITz-1-TEV-XbaI-RV<br>BLITz-2-TEV-XbaI-RV<br>BLITz-3-TEV-XbaI-RV | AAAGAGCTCGGTAGTGGTAGTGGGGAGTTTCTGGC<br>TTTCTAGAGCCCTGGAAGTACAGGTTCTCAGCAATCTGAAAGGCTG<br>TCTTTTTGATCAGGC<br>TTTTCTAGAGCCCTGGAAGTACAGGTTCTCAAAGGCTGTCTTTTTG<br>ATCAGGCAGACCGC<br>ATCTAGAGCCCTGGAAGTACAAATTTTCGTCTCGTTCGCTGC | to generate BLITz- 1 ~ domain by PCR amplification                                   |
| BLITz-4-FW<br>BLITz-4-RV                                                            | CCTTTTCAGATTGCTGAGGCTGAGAACCTGTACTTCCAG<br>CAGGTTCTCAGCCTCAGCAATCTGAAAGGCTGTCTTTTTG                                                                                                                                        | to generate BLITz-4 by site-directed mutagenesis                                     |
| BLITz-5-FW<br>BLITz-5-RV                                                            | CAGATTGCTGAGGCCCTGTACTTCCAGGGCTCTAGATTAG<br>GAAGTACAGGGCCTCAGCAATCTGAAAGGCTGTCTTTTTG                                                                                                                                       | to generate BLITz-5 by site-directed mutagenesis                                     |
| BLITz-6-FW<br>BLITz-6-RV                                                            | GCCTTTTCAGATTGAGAACCTGTACTTCCAGGGCTCTAG<br>CAGGTTCTCAATCTGAAAGGCTGTCTTTTTGATCAGGC                                                                                                                                          | to generate BLITz-6 by site-directed mutagenesis                                     |
| XhoI-CRY2PHR-FW<br>CRY2PHR-PstI-RV                                                  | AAACTCGAGGCCACCATGAAGATGGACAAAAAGAC<br>TTTGCTAGCTGCTGCTCCGATCATGATCTG                                                                                                                                                      | to introduce CRY2 domain by PCR amplification                                        |
| BamHI-DRD2-FW<br>DRD2-EcoRI-RV                                                      | TTTAAGCTTATGGATCCACTGAACCTGTCCTGG<br>TTTGAATTCGCAGTGCAAGATCTTCATGAAGGCC                                                                                                                                                    | to introduce DRD2 by PCR amplification                                               |
| EcoRI-TdTomato-FW<br>TdTomato-XbaI-RV                                               | CCTGAATTCATGGTGAGCAAGGGCGAG<br>CTATCTAGACTACTTGTACAGCTCGTCC                                                                                                                                                                | to introduce TdTomato sequence by PCR amplification                                  |
| SacI-LK-TEV-N-FW<br>TEV-N-SphI RV                                                   | AAAGAGCTCACTCGAAGGTGGCGGTGGCTCTGGAGGTGG<br>TTTGCATGCCTGAAAGTTTGTGGTCACCAGAC                                                                                                                                                | to introduce TEV-N by PCR amplification                                              |
| Hind3-β-Arr2-FW<br>β-Arr2-SacI-RV                                                   | TTTAAGCTTATGGGTGAAAACCCGGGACCAGGG<br>AAAGAGCTCAGGCAGAAGTGGTCATCACAGTCGTC                                                                                                                                                   | to introduce β-Arrestin2 by PCR amplification                                        |
| XhoI-TEV-N FW<br>BLITz-1-TEV-XbaI-RV                                                | AAACTCGAGGGTATGGGCGAGAGCCTGTTCAAGGG<br>TTTCTAGAGCCCTGGAAGTACAGGTTCTCAGCAATCTGAAAGGCTG<br>TCTTTTTGATCAGGC                                                                                                                   | to amplify TEV-N-AsLOV2 by PCR amplification                                         |
| SacI-TEV-C-FW<br>TEV-C-SphI-RV                                                      | AAAGAGCTCAGGTGGCGGTGGCTCTGGAGGTGGTGGG<br>TTTGCATGCACCCCGGCCTCCTGCGATTTCATC                                                                                                                                                 | to introduce TEV-C by PCR amplification                                              |
| EcoRI-EGFP-FW<br>EGFP-NheI-RV                                                       | CCTGAATTCATGGTGAGCAAGGGCGAGG<br>TAAGCTAGCCTACTTGTACAGCTCGTCCATGCCG                                                                                                                                                         | to introduce EGFP sequence by PCR amplification                                      |
| Tango-FW<br>Tango-RV                                                                | AAAATGAAGACGATCATCGCCCTGAGC<br>TTTCGATGAAGTGTCTTGGCCAGGGA                                                                                                                                                                  | to introduce NPY1R and 5-HT1A sequence by PCR amplification from presto-Tango vector |
| BamHI-CB1R-FW<br>CB1R-EcoRI-RV                                                      | ATGGATCCAATGAAGAGCATTTTGGATGGGC<br>TTTGAATTCAGAGCTTCGGCAGATGTGTCAG                                                                                                                                                         | to introduce CB1R sequence by PCR amplification                                      |
